# Supplementary material for: Prevalence and incidence of diabetes among Aboriginal people in remote communities of the Northern Territory, Australia: a retrospective, longitudinal data-linkage study
Source: PubMed Central journal article supplement — BMJ Open. 2022 May 9;12(5):e059716. doi: 10.1136/bmjopen-2021-059716 (PMC9125760; doi:10.1136/bmjopen-2021-059716), 2022-05-09
Supplement: bmjopen-2021-059716.draft_revisions.pdf [file bmjopen-2021-059716.draft_revisions.pdf]

# BMJ Open

BMJ Open is committed to open peer review. As part of this commitment we make the peer review history of every article we publish publicly available.

When an article is published we post the peer reviewers' comments and the authors' responses online. We also post the versions of the paper that were used during peer review. These are the versions that the peer review comments apply to.

The versions of the paper that follow are the versions that were submitted during the peer review process. They are not the versions of record or the final published versions. They should not be cited or distributed as the published version of this manuscript.

BMJ Open is an open access journal and the full, final, typeset and author-corrected version of record of the manuscript is available on our site with no access controls, subscription charges or pay-per-view fees (<http://bmjopen.bmj.com>).

If you have any questions on BMJ Open's open peer review process please email [info.bmjopen@bmj.com](mailto:info.bmjopen@bmj.com)

# BMJ Open

## The prevalence and incidence of diabetes among Aboriginal people in remote communities of the Northern Territory, Australia: a retrospective, longitudinal data-linkage study.

|                               |                                                                                                                                                                                                                                                                                                                                                                                                                                                                                                                                                                                                                                                                                                                                                                                                                                                                                                                                                                                                                                                |
|-------------------------------|------------------------------------------------------------------------------------------------------------------------------------------------------------------------------------------------------------------------------------------------------------------------------------------------------------------------------------------------------------------------------------------------------------------------------------------------------------------------------------------------------------------------------------------------------------------------------------------------------------------------------------------------------------------------------------------------------------------------------------------------------------------------------------------------------------------------------------------------------------------------------------------------------------------------------------------------------------------------------------------------------------------------------------------------|
| Journal:                      | <i>BMJ Open</i>                                                                                                                                                                                                                                                                                                                                                                                                                                                                                                                                                                                                                                                                                                                                                                                                                                                                                                                                                                                                                                |
| Manuscript ID                 | bmjopen-2021-059716                                                                                                                                                                                                                                                                                                                                                                                                                                                                                                                                                                                                                                                                                                                                                                                                                                                                                                                                                                                                                            |
| Article Type:                 | Original research                                                                                                                                                                                                                                                                                                                                                                                                                                                                                                                                                                                                                                                                                                                                                                                                                                                                                                                                                                                                                              |
| Date Submitted by the Author: | 29-Nov-2021                                                                                                                                                                                                                                                                                                                                                                                                                                                                                                                                                                                                                                                                                                                                                                                                                                                                                                                                                                                                                                    |
| Complete List of Authors:     | Hare, Matthew; Charles Darwin University, Menzies School of Health Research; Royal Darwin Hospital, Department of Endocrinology<br>Zhao, Yuejen; NT Health, Population and Digital Health<br>Guthridge, Steven; Charles Darwin University, Menzies School of Health Research<br>Burgess, Paul; NT Health, Population and Digital Health; Top End Region, NT Health, Primary Health Care Division<br>Barr, Elizabeth L. M.; Charles Darwin University, Menzies School of Health Research; Baker Heart and Diabetes Institute, Clinical Diabetes and Epidemiology<br>Ellis, Elna; Alice Springs Hospital, Department of Medicine<br>Butler, Deborah; NT Health<br>Rosser, Amy; Central Australia Region, NT Health, Primary Health Care Division<br>Falhammar, Henrik; Karolinska Institutet, Department of Molecular Medicine and Surgery; Karolinska University Hospital, Department of Endocrinology<br>Maple-Brown, Louise; Charles Darwin University, Menzies School of Health Research; Royal Darwin Hospital, Department of Endocrinology |
| Keywords:                     | General diabetes < DIABETES & ENDOCRINOLOGY, EPIDEMIOLOGY, PUBLIC HEALTH                                                                                                                                                                                                                                                                                                                                                                                                                                                                                                                                                                                                                                                                                                                                                                                                                                                                                                                                                                       |
|                               |                                                                                                                                                                                                                                                                                                                                                                                                                                                                                                                                                                                                                                                                                                                                                                                                                                                                                                                                                                                                                                                |

SCHOLARONE™  
Manuscripts

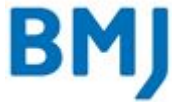

I, the Submitting Author has the right to grant and does grant on behalf of all authors of the Work (as defined in the below author licence), an exclusive licence and/or a non-exclusive licence for contributions from authors who are: i) UK Crown employees; ii) where BMJ has agreed a CC-BY licence shall apply, and/or iii) in accordance with the terms applicable for US Federal Government officers or employees acting as part of their official duties; on a worldwide, perpetual, irrevocable, royalty-free basis to BMJ Publishing Group Ltd ("BMJ") its licensees and where the relevant Journal is co-owned by BMJ to the co-owners of the Journal, to publish the Work in this journal and any other BMJ products and to exploit all rights, as set out in our [licence](#).

The Submitting Author accepts and understands that any supply made under these terms is made by BMJ to the Submitting Author unless you are acting as an employee on behalf of your employer or a postgraduate student of an affiliated institution which is paying any applicable article publishing charge ("APC") for Open Access articles. Where the Submitting Author wishes to make the Work available on an Open Access basis (and intends to pay the relevant APC), the terms of reuse of such Open Access shall be governed by a Creative Commons licence – details of these licences and which [Creative Commons](#) licence will apply to this Work are set out in our licence referred to above.

Other than as permitted in any relevant BMJ Author's Self Archiving Policies, I confirm this Work has not been accepted for publication elsewhere, is not being considered for publication elsewhere and does not duplicate material already published. I confirm all authors consent to publication of this Work and authorise the granting of this licence.

**Title:** The prevalence and incidence of diabetes among Aboriginal people in remote communities of the Northern Territory, Australia: a retrospective, longitudinal data-linkage study.

**Author names and affiliations:**

Matthew J. L. Hare<sup>a,b</sup>

Yuejen Zhao<sup>c</sup>

Steven Guthridge<sup>a</sup>

Paul Burgess<sup>c,d</sup>

Elizabeth L. M. Barr<sup>a,e</sup>

Elna Ellis<sup>f</sup>

Deborah Butler<sup>g</sup>

Amy Rosser<sup>h</sup>

Henrik Falhammar<sup>a,b,i,j\*</sup>

Louise J. Maple-Brown<sup>a,b\*</sup>

*\*Joint senior authors*

a) Menzies School of Health Research, Charles Darwin University, Darwin, Northern Territory, Australia

b) Department of Endocrinology, Royal Darwin Hospital, Darwin, Northern Territory, Australia

c) Population and Digital Health, NT Health, Darwin, Northern Territory, Australia

d) Primary Health Care Division, Top End Region, NT Health, Darwin, Northern Territory, Australia

e) Clinical Diabetes and Epidemiology, Baker Heart and Diabetes Institute, Melbourne, Victoria, Australia

f) Department of Medicine, Alice Springs Hospital, Alice Springs, Northern Territory, Australia

g) NT Health, Northern Territory Government, Darwin, Northern Territory, Australia

h) Primary Health Care Division, Central Australia Region, NT Health, Alice Springs, Northern Territory, Australia

i) Department of Molecular Medicine and Surgery, Karolinska Institutet, Karolinska University Hospital, Stockholm, Sweden

j) Department of Endocrinology, Karolinska University Hospital, Stockholm, Sweden.

**Corresponding Author:**

Dr Matthew Hare

Menzies School of Health Research

PO Box 41096, Casuarina, NT, 0811, Australia. matthew.hare@menzies.edu.au

T: + 61 8 8946 8616

## Abstract

**Objectives:** To assess the prevalence and incidence of diabetes among Aboriginal peoples in remote communities of the Northern Territory (NT), Australia.

**Design:** Retrospective cohort analysis of linked clinical and administrative dataset from 1<sup>st</sup> July 2012 to 30<sup>th</sup> June 2019.

**Setting:** All remote health centres using the NT Government Primary Care Information System (n=51).

**Participants:** All Aboriginal clients residing in remote communities serviced by these health centres (N=21 267).

**Primary outcome measures:** Diabetes diagnoses were established using hospital and primary care coding, biochemistry and prescription data.

**Results:** Diabetes prevalence across all ages increased from 14.4% (95% CI: 13.9-14.9%) to 17.0% (95% CI: 16.5-17.5%) over seven years. Among adults ( $\geq 20$  years), the 2018/19 diabetes prevalence was 28.6% (95% CI: 27.8-29.4%), being higher in Central Australia (39.5%, 95% CI: 37.8-41.1%) compared to the Top End region (24.2%, 95% CI: 23.3-25.1%,  $p < 0.001$ ). Between 2016/17 and 2018/19, diabetes incidence across all ages was 7.9 per 1000 person-years (95% CI: 7.3-8.7 per 1000 person-years). The adult incidence of diabetes was 12.6 per 1000 person-years (95% CI: 11.5-13.8 per 1000 person-years).

**Conclusions:** The burden of diabetes in the remote Aboriginal population of the NT is among the highest in the world. Strengthened systems of care and public health prevention strategies, developed in partnership with Aboriginal communities, are needed.

### Strengths and limitations of this study

- This study describes the burden of diabetes among Aboriginal peoples in the Northern Territory, Australia, who represent some of the world's longest surviving cultures but experience substantial health and social inequality compared to the broader Australian population.
- The large sample size and use of detailed, individual-level data with a robust data-linkage methodology provide reliable epidemiological estimates in a context where traditional observational studies are immensely challenging, not least due to the population being dispersed over such a vast geographic area.
- The retrospective approach relies on existing clinical data, so the prevalence and incidence of diabetes may be underestimated due to incomplete screening.
- Our findings are unlikely to be generalisable to Aboriginal peoples living in urban centres or in other regions of Australia.

## Introduction

Diabetes is a major cause of morbidity and premature mortality worldwide. Prevalence rates of type 2 diabetes and obesity have increased in recent decades due to factors such as globalisation and urbanisation, which are accompanied by sedentary behaviour and energy-dense diets.<sup>1,2</sup>

Accompanying these factors, there is growing interest in the role of epigenetic mechanisms and the intrauterine environment as drivers of intergenerational diabetes and obesity risk.<sup>2</sup> The increasing prevalence of diabetes is also contributed to by ageing of populations and improved survival with the condition.<sup>1-3</sup>

Indigenous populations are disproportionately affected by diabetes and associated complications.<sup>4</sup> Social determinants of health are likely key contributors.<sup>4</sup> In Australia, diabetes was the third leading cause of death for Aboriginal and Torres Strait Islander peoples in 2019.<sup>5</sup> The 2018-19 National Aboriginal and Torres Strait Islander Health Survey estimated a diabetes prevalence of 8% among all ages, being higher (12%) in remote areas.<sup>6</sup> These self-reported data are an underestimation. There is also geographic variability, with prevalence rates up to 33% previously reported in specific communities.<sup>7</sup>

The Northern Territory (NT) of Australia spans a vast area of 1.35 million km<sup>2</sup> (more than twice the area of France) with a population density of just 0.2 people/km<sup>2</sup>.<sup>8</sup> Over 30% of the population identify as Aboriginal people, 77% of whom live in remote or very remote areas.<sup>8</sup> Some areas of the NT were less impacted by colonisation until the mid-20<sup>th</sup> century and there remains great strength and diversity of culture, with more than 100 Aboriginal languages still spoken.<sup>9</sup> The NT is commonly considered in two broad regions, the Top End and Central Australia. In 2005, the prevalence of diabetes among Aboriginal people was estimated at 16% in Central Australia and 7.7% in the Top End.<sup>10</sup> More recent accurate estimates of the diabetes burden are lacking.

1  
2  
3  
4  
5 In this context, we examined trends in diabetes prevalence, contemporary diabetes incidence rates,  
6  
7 and the demographic and clinical characteristics of people with diabetes among Aboriginal peoples  
8  
9 in remote communities across the NT.  
10  
11  
12  
13  
14  
15

## 16 **Methods**

### 17 *Study population*

18  
19  
20  
21 The study included all Aboriginal clients, who were recorded as being local residents, of all remote  
22  
23 health centres using the NT Health Primary Care Information System. This electronic medical record  
24  
25 system is used in 51 out of 84 remote health services in the NT (approximate locations shown in Fig.  
26  
27 1). As the clinics are sole service providers in these communities, almost all the local population are  
28  
29 clients. To have been included, an individual must have had an interaction with a clinic since 1<sup>st</sup> July  
30  
31 2007. Births and deaths are updated monthly by relevant government agencies. Additionally, client  
32  
33 lists are updated every six months in collaboration with local community members to account for  
34  
35 population mobility. Aboriginal ethnicity is self-identified in NT Health records. A 2011 validation  
36  
37 study showed 98% concordance between Aboriginal identification in health records and findings  
38  
39 from interviews.<sup>11</sup>  
40  
41  
42  
43  
44  
45  
46  
47

### 48 *Study design*

49  
50 A retrospective cohort analysis of linked clinical and administrative data from 1<sup>st</sup> July 2012 to 30<sup>th</sup>  
51  
52 June 2019 was performed.  
53  
54  
55

### 56 *Data sources*



1  
2  
3 Deidentified data were from the NT Health Primary Care Information System (PCIS) and the Hospital  
4  
5 Inpatient Activity dataset. Individual level records were deterministically linked using a unique  
6  
7 identifier, the Hospital Reference Number (HRN), which is used across all NT Health services. The  
8  
9 HRN has been reliably used for deterministic linkage in previous studies.<sup>12</sup> Implementation of PCIS  
10  
11 commenced in 2004 and was completed by 2010. Data for this study included demographics,  
12  
13 community 'resident' or 'visitor' status, International Classification of Primary Care (ICPC) coded  
14  
15 diagnoses, medication prescriptions, biochemistry results and date of death. The Hospital Inpatient  
16  
17 Activity dataset provided International Classification of Diseases, Tenth Revision, Australian  
18  
19 Modification (ICD-10-AM) codes for principal and secondary diagnoses for inpatient admissions to  
20  
21 the NT's six public hospitals during the study period and date of death from discharge coding.  
22  
23  
24  
25  
26  
27

### 28 *Outcome definitions*

29  
30 Individuals meeting any of the following criteria were considered to have diabetes: (i) coding for  
31  
32 diabetes in primary care (ICPC) or hospital (ICD-10-AM) data, (ii) prescription of a diabetes  
33  
34 medication according to Anatomical Therapeutic Chemical (ATC) classification code A10 other than  
35  
36 metformin, and/or (iii) biochemical evidence of diabetes on at least two occasions. Details of ICPC  
37  
38 and ICD-10-AM inclusions are in Supplementary Table 1. Our case ascertainment was informed by a  
39  
40 manual validation study of individual patient records (details in Appendix). Biochemical criteria  
41  
42 included haemoglobin A1c (HbA1c)  $\geq 6.5\%$  ( $\geq 48$  mmol/mol), fasting plasma glucose  $\geq 7.0$  mmol/L, 2-  
43  
44 hour plasma glucose  $\geq 11.1$  mmol/L, and/or random capillary or plasma glucose  $\geq 11.1$  mmol/L. In  
45  
46 order to avoid inclusion of gestational diabetes mellitus (GDM), data were excluded for nine months  
47  
48 prior and three months following a diagnosis code for GDM in either the primary care or hospital  
49  
50 datasets. Type 1 and "other" diabetes were identified using ICD-10-AM and ICPC coding. People with  
51  
52 diabetes, not identified as type 1 or "other", were presumed to have type 2. If a person was assigned  
53  
54 conflicting codes relating to diabetes type (n=39), their clinical records were manually reviewed and  
55  
56  
57  
58  
59  
60

1  
2  
3 diabetes type adjudicated based on documentation by their treating clinicians and relevant  
4  
5 investigations.  
6  
7  
8  
9

### 10 *Statistical methods*

11  
12 Descriptive statistics were calculated for the total study population, people with prevalent diabetes  
13  
14 and people with incident diabetes. Annual diabetes prevalence (%) was calculated for the total  
15  
16 population for each financial year (1<sup>st</sup> July to 30<sup>th</sup> June) between 2012/13 and 2018/19. Current  
17  
18 prevalence (2018/19) was stratified by sex and decade of age and also calculated for adults, defined  
19  
20 as  $\geq 20$  years old for consistency with the International Diabetes Federation Diabetes Atlas.<sup>13</sup> Trends  
21  
22 in prevalence over time were assessed using negative binomial regression. Subgroup analyses of the  
23  
24 Top End and Central Australia regions were performed for 2018/19 due to known demographic and  
25  
26 epidemiological differences between these populations.<sup>10,14</sup> Comparisons between regions were  
27  
28 performed using the Pearson chi-square test, nonparametric equality-of-medians test and unpaired  
29  
30 t-test as appropriate.  
31  
32  
33  
34  
35  
36

37 Due to smaller numbers, diabetes incidence was assessed in aggregate over a three-year period  
38  
39 (2016/17 to 2018/19). Trends in incidence over time were not assessed. A diagnosis was considered  
40  
41 incident when a person was first recorded as meeting the study criteria for diabetes and that person  
42  
43 had records available within the preceding five years with no evidence of diabetes.  
44  
45  
46  
47

48 All analyses were performed in Stata (Version SE16.1, StataCorp, Texas).  
49  
50  
51

### 52 *Patient and Public Involvement*

53  
54 Interpretation and reporting of the study findings involved Aboriginal people living in the NT,  
55  
56 including two of the authorship group and a third contributor, who requested to remain anonymous.  
57  
58 Wider dissemination and communication of the research findings back to Aboriginal communities in  
59  
60

1  
2  
3 the NT and the development of future translational work to address the public health concerns  
4  
5 raised in this study will be guided by the Aboriginal and Torres Strait Islander Advisory Group of the  
6  
7 Diabetes across the Lifecourse: Northern Australia Partnership.  
8  
9

### 10 11 12 *Ethics*

13  
14 The study was approved by the Human Research Ethics Committee of Northern Territory  
15  
16 Department of Health and Menzies School of Health Research (Ref: 2016-2675).  
17  
18  
19  
20  
21  
22

### 23 **Results**

24  
25  
26  
27 Over seven years, 21 267 Aboriginal people from 51 remote communities across the NT were  
28  
29 included. Median age at baseline was 22 (9-39) years, 10 902 (51.3%) were women, 15 035 (70.7%)  
30  
31 were from the Top End and 1059 (5.0%) died during the study period. In the 2012/13 financial year,  
32  
33 14.4% (95% CI: 13.9%-14.9%, n/N=2749/19 042) of people had diabetes. By 2018/19 this prevalence  
34  
35 had increased to 17.0% (95% CI: 16.5%-17.5%, n/N=3477/20 429). Figure 2 depicts the 18% increase  
36  
37 in prevalence over the study period (annual increase 2.5%, 95% CI: 1.9%-3.1%, p<0.001). In 2018/19,  
38  
39 the prevalence among adults was 28.6% (95% CI: 27.8%-29.4%, n/N=3414/11 939). Figure 3 shows  
40  
41 that diabetes prevalence was higher with increasing age, except in the oldest age-group ( $\geq 70$  years),  
42  
43 and that there were more women than men with diabetes in all age-groups.  
44  
45  
46  
47  
48  
49

50 In 2018/19, diabetes was more prevalent in Central Australia than the Top End across all ages (23.0%  
51  
52 vs. 14.5%, p<0.001) and among adults (39.5% vs. 24.2%, p<0.001). Characteristics of all people with  
53  
54 diabetes in 2018/19 are presented in Table 1. Among these, 2115 (60.8%) were women, 669 (19.2%)  
55  
56 were prescribed insulin and 567 (16.3%) had HbA1c  $\geq 10\%$  ( $\geq 86$  mmol/mol). In Central Australia, a  
57  
58  
59  
60

1  
2  
3 greater proportion of people had an HbA1c  $\geq 10\%$  ( $\geq 86$  mmol/mol) and rates of insulin prescribing  
4  
5 were higher than in the Top End (both  $p < 0.001$ ).  
6  
7  
8  
9

10 Between July 2016 and June 2019, there were 483 new cases of diabetes. The incidence rate in the  
11 total population was 7.9 (95% CI: 7.3-8.7) per 1000 person-years. Age-specific incidence rates are  
12 presented in Figure 4. Median age at diabetes diagnosis was 38 (IQR 29-49) years. The peak  
13 incidence was among 50-59 year-olds (16.4 [95% CI: 15.9-16.9] per 1000 person-years), with  
14 similarly high rates among 30-39 and 40-49 year-olds. Among adults, the incidence rate was 12.6  
15 (95% CI: 11.5-13.8) per 1000 person-years. Of all people with incident diabetes, 287 (59.4%) were  
16 female, 328 (67.9%) lived in the Top End and 481 (99.6%) had type 2 diabetes.  
17  
18  
19  
20  
21  
22  
23  
24  
25  
26  
27  
28  
29

### 30 Discussion

31  
32  
33

34 The burden of diabetes among Aboriginal people in remote communities of the NT, Australia, is  
35 immense and growing. Despite the relatively young age of this population, which includes children,  
36 we report a current diabetes prevalence of 17%. The findings are particularly concerning when  
37 restricted to adults (29% affected). The prevalence was greatest in Central Australia, where 40% of  
38 adults now have diabetes. Age of onset was relatively young with high incidence rates observed  
39 between 30-59 years of age. Of people with diabetes who had an HbA1c level checked in 2018/19,  
40 more than one in five had an HbA1c  $\geq 10\%$  ( $\geq 86$  mmol/mol). This combination of young age of onset  
41 and severe chronic hyperglycaemia is likely to be accompanied by a high burden of diabetes  
42 complications and premature mortality.<sup>15,16</sup>  
43  
44  
45  
46  
47  
48  
49  
50  
51  
52  
53  
54  
55

56 The epidemic of diabetes among Aboriginal people in the remote NT has occurred in recent history  
57 and has continued to grow in the last few decades. In 1997, the prevalence of diabetes in Aboriginal  
58  
59  
60

1  
2  
3 adults from 15 remote communities was estimated at 15%.<sup>17</sup> Using similar data sources to our study  
4  
5 (also including children), the prevalence of diabetes in 2005 was estimated at 16% in Central  
6  
7 Australia and 7.7% in the Top End.<sup>10</sup> We report rates of 23% in Central Australia and 15% in the Top  
8  
9 End. Thus, in less than 15 years, there has been substantial growth in the diabetes burden. The adult  
10  
11 prevalence among Aboriginal people in Central Australia is among the highest ever reported, being  
12  
13 similar to what was famously reported among the Pima Indian population of Arizona in the 1970s  
14  
15 (42% among those aged  $\geq 25$  years) and higher than the current top country-wide prevalence, which  
16  
17 is in the Marshall Islands (31% among those aged  $\geq 20$  years).<sup>13,18</sup> These comparisons are made for  
18  
19 illustrative purposes only given the differences in study methodologies and lack of age  
20  
21 standardisation to a common reference population.  
22  
23  
24  
25  
26  
27

28 We found that diabetes was more common with increasing age, except over 70 years, where  
29  
30 prevalence dropped considerably. In Western populations, diabetes prevalence consistently  
31  
32 increases with age.<sup>19</sup> However, studies in the NT Aboriginal population from the 1990s and early  
33  
34 2000s found that diabetes prevalence peaked in middle age (45-54 years) and then decreased  
35  
36 among older age-groups.<sup>20</sup> This was likely due to a combination of a 'healthy survivor' effect and the  
37  
38 timing of lifestyle changes relating to colonisation. Another contributing factor could be that, despite  
39  
40 the importance of connection to country, as a last resort, older people with chronic conditions are  
41  
42 more likely to move to urban centres with better access to services, leaving a relatively healthier  
43  
44 older population in remote communities. Now, two decades later, the age at which this  
45  
46 phenomenon is observed is proportionately higher. This likely reflects improvements in life  
47  
48 expectancy for people with chronic conditions and a greater length of time since these communities  
49  
50 underwent rapid social and environmental transitions.  
51  
52  
53  
54  
55  
56

57 The higher prevalence of diabetes observed among women compared to men in all age groups is  
58  
59 noteworthy. This difference has been observed in Aboriginal Australians previously and also in other  
60

1  
2  
3 Indigenous populations in North America.<sup>7,18,21,22</sup> It contrasts with the national Australian population  
4 and most populations internationally, in which the prevalence of known diabetes is greater among  
5  
6 men.<sup>1,13,19</sup> The disparity observed among Aboriginal women in Australia has been shown to relate to  
7  
8 obesity.<sup>7,23</sup> However, further research is needed to understand the mechanisms underlying this  
9  
10 disparity in metabolic health between Aboriginal women and men. One postulated mechanism is a  
11  
12 sex-specific difference in the impact of maternal glycaemia on the developing fetus and thus  
13  
14 diabetes risk in that next generation. The effect of fetal hyperinsulinism on both birthweight and  
15  
16 postnatal growth appears to differ between girls and boys.<sup>24,25</sup> It has been hypothesised that fetal  
17  
18 hyperinsulinism may lead to a degree of persistent insulin resistance that is more pronounced in  
19  
20 girls.<sup>25</sup> Nevertheless, it is likely that numerous biological and sociocultural factors are contributing to  
21  
22 the higher prevalence of diabetes among women than men. Differences in physical activity may be  
23  
24 partly responsible, especially among younger age groups.<sup>23</sup> Additionally, uptake of screening may  
25  
26 contribute to some of the observed difference, with national data showing that women are more  
27  
28 likely than men to undertake a routine health check specifically funded for Aboriginal and Torres  
29  
30 Strait Islander people.<sup>26</sup>

31  
32  
33  
34  
35  
36  
37  
38  
39 Few studies have examined diabetes incidence in Aboriginal communities in Australia. The first  
40  
41 available estimate is from two remote Central Australia communities, published in 1999. Diabetes  
42  
43 incidence among people aged  $\geq 15$  years was 20.3 per 1000 person-years.<sup>27</sup> Our current observed  
44  
45 adult incidence rate across remote NT communities was lower (12.6 per 1000 person-years). This  
46  
47 incidence rate is also lower than that observed in an Aboriginal cohort in Queensland between 1999-  
48  
49 2007.<sup>28</sup> Each of these studies involved geographically and culturally distinct populations and  
50  
51 employed different methodologies. Furthermore, the estimates are not age and sex-standardised.  
52  
53  
54

55  
56  
57 While there may have been some improvement in diabetes incidence in the last two decades, the  
58  
59 observed rates remain high. Australian data from the National Diabetes Services Scheme (NDSS)  
60

1  
2  
3 show that the national type 2 diabetes incidence rate in 2014 was 2.4 per 1000 person-years.<sup>29</sup>

4  
5 These NDSS data may underestimate the true incidence due to unregistered cases. Nevertheless, it  
6  
7 has been estimated that 87% of people with diabetes are NDSS-registered.<sup>30</sup> Compared to these  
8  
9 data from the multiethnic national population of Australia, the age-specific incidence rate in our  
10  
11 study cohort was 26-times greater at 20-29 years, 12-times greater at 30-39 years and 5-times  
12  
13 greater at 40-49 years (DJ Magliano, personal communication).  
14  
15  
16

17  
18 Our study again confirms the high rates of metabolic disease that accompany rapid transitions in  
19  
20 lifestyle among previously lean and physically active populations. Such epidemiological transitions  
21  
22 have particularly impacted Indigenous peoples with similar histories of European colonisation.<sup>4,31</sup>  
23  
24 The underlying determinants are not well delineated but are likely multifactorial and compound  
25  
26 each other. A degree of heightened genetic susceptibility is hypothesised but not well proven.<sup>32</sup>  
27  
28 Growing evidence suggests epigenetic mechanisms also have a role, with factors such as intrauterine  
29  
30 exposure to hyperglycaemia or maternal undernutrition impacting long-term phenotypic expression  
31  
32 in the offspring.<sup>33</sup> Such alterations in gene expression may also be passed on to subsequent  
33  
34 generations.<sup>34</sup> The NT Aboriginal population continues to experience elevated rates of low  
35  
36 birthweight and pre-term birth.<sup>35</sup> At the same time, rates of diabetes in pregnancy and high  
37  
38 birthweight are increasing.<sup>35</sup> These early-life risk factors may be contributing to the ongoing diabetes  
39  
40 epidemic.  
41  
42  
43  
44  
45  
46  
47

48 The higher burden of diabetes observed in Central Australia compared to the Top End is consistent  
49  
50 with previous studies.<sup>10</sup> There are numerous distinct Aboriginal people groups across the NT, with  
51  
52 great diversity in culture, environment and socioeconomic factors. An early study from the 1980s  
53  
54 found that Aboriginal people from desert communities had greater hyperinsulinemia than coastal  
55  
56 communities.<sup>36</sup> The authors predicted that this could indicate a future greater burden of diabetes in  
57  
58 these people groups as the duration of urbanisation increased.<sup>36</sup>  
59  
60

1  
2  
3  
4  
5 Underlying these biological hypotheses, the most important contributors to this epidemic are likely  
6 to be social and environmental factors. Aboriginal people in the NT experience socioeconomic  
7 disadvantage across numerous domains, including income, employment, education and housing.<sup>37</sup>  
8 These factors explain a large portion of the inequity in health outcomes relative to non-Aboriginal  
9 people.<sup>37</sup> These challenges are more pronounced in remote areas, where overcrowded, inadequate  
10 housing and food insecurity are major issues.<sup>38</sup> Healthy food items are expensive in remote stores,  
11 with survey data suggesting more than a third of daily energy intake is from discretionary food and  
12 drinks.<sup>38</sup> Previous evidence suggests that some of the health disparities between Central Australia  
13 and Top End communities relate to differences in social and environmental factors.<sup>14</sup>  
14  
15  
16  
17  
18  
19  
20  
21  
22  
23  
24  
25  
26  
27

28 Strengths of our study include the use of detailed, individual-level data and the large sample size.  
29 The use of a client population raises the question of whether the study cohort represents the true  
30 population of these remote communities. As discussed in the methods, the client databases of these  
31 sole-provider remote health services include almost all the local Aboriginal population. The study is  
32 inherently limited by the retrospective design. Our diabetes estimates are reliant on known  
33 diagnoses and it is likely the population is incompletely screened, which would contribute to an  
34 underestimation of both prevalence and incidence. There may also be some bias regarding the  
35 demographics of people who are more likely to participate in screening. Unfortunately, we were  
36 unable to assess time trends in diabetes incidence due to limited numbers and the potential  
37 unreliability of differentiating incident and prevalent cases in the early years of the PCIS electronic  
38 medical record system. Our findings are unlikely to be generalisable to Aboriginal peoples living in  
39 urban centres or in other regions of Australia.  
40  
41  
42  
43  
44  
45  
46  
47  
48  
49  
50  
51  
52  
53  
54  
55  
56  
57  
58  
59  
60

## Conclusion



1  
2  
3 The burden of diabetes among Aboriginal people in remote communities of the NT is among the  
4  
5 highest reported of any population globally despite the population being relatively young. Many  
6  
7 factors associated with increasing prevalence of diabetes are beyond individual control, and thus  
8  
9 strengthened systems of care and public health prevention strategies, developed and implemented  
10  
11 in partnership with Aboriginal communities, are needed. These strategies should be holistic,  
12  
13 considering emotional, spiritual and mental wellbeing, as well as physical health. The enormity of  
14  
15 the diabetes burden necessitates population-wide prevention strategies, including cross-sectoral  
16  
17 collaboration to address the social determinants of health.  
18  
19  
20  
21  
22  
23  
24  
25  
26  
27  
28  
29  
30  
31  
32  
33  
34  
35  
36  
37  
38  
39  
40  
41  
42  
43  
44  
45  
46  
47  
48  
49  
50  
51  
52  
53  
54  
55  
56  
57  
58  
59  
60

For peer review only

1  
2  
3 **Contributors:** MJLH led the analysis planning, interpretation of findings and drafting of the  
4 manuscript. HF and LJMB contributed equally as senior authors, supervising all aspects of the study,  
5 including conception of the study, ethics application, study design, study conduct, analysis planning,  
6 interpretation of findings and manuscript preparation . YZ, SG, PB and ELMB contributed to study  
7 conception, study design, analysis planning, interpretation of findings and critically revised the  
8 manuscript. YZ additionally provided statistical expertise and undertook the data analysis. DB (a  
9 Jawoyn woman and health policymaker), AR (a Gubbi Gubbi woman and Senior Remote Medical  
10 Practitioner in Central Australia) and EE (Endocrinologist in Central Australia) contributed to  
11 interpretation of data and critically revised the work for important intellectual content. All authors  
12 approved the final version and agreed to be accountable for the work. YZ is the guarantor for the  
13 analyses.  
14  
15  
16  
17  
18  
19  
20  
21  
22

23 **Acknowledgements:** We gratefully acknowledge the contribution of an Aboriginal community  
24 member from the Central Australia region of the NT, who revised the manuscript and requested to  
25 remain anonymous. We acknowledge NT Health for access to the datasets used and thank  
26 professionals from NT Health hospitals and remote primary healthcare who contributed to these  
27 datasets in their day-to-day work.  
28  
29  
30  
31  
32

33 **Funding:** This research did not receive any specific grant from funding agencies in the public,  
34 commercial or not-for-profit sectors. MJLH is supported by National Health and Medical Research  
35 Council (NHMRC) postgraduate scholarship (No. 1169091), Diabetes Australia and the Australian  
36 Academy of Science. LJMB is supported by NHMRC Investigator Grant (No. 1194698).  
37  
38  
39  
40  
41

42 **Data availability statement:** The Northern Territory Department of Health is the owner of the data  
43 used for this study. Reasonable requests for access to the deidentified study dataset would be  
44 considered after required approvals from the data custodians are in place.  
45  
46  
47

48 **Competing interests:** MJLH has received honoraria for lectures and consultancies from AstraZeneca,  
49 Eli Lilly and Novo Nordisk. All other authors have no interests to declare.  
50  
51  
52  
53  
54  
55  
56  
57  
58  
59  
60

**References:**

1. NCD Risk Factor Collaboration. Worldwide trends in diabetes since 1980: a pooled analysis of 751 population-based studies with 4.4 million participants. *Lancet* 2016;**387**:1513-30.
2. Zimmet PZ, Magliano DJ, Herman WH, Shaw JE. Diabetes: a 21st century challenge. *Lancet Diabetes Endocrinol* 2014;**2**:56-64.
3. Harding JL, Pavkov ME, Magliano DJ, Shaw JE, Gregg EW. Global trends in diabetes complications: a review of current evidence. *Diabetologia* 2019;**62**:3-16.
4. Harris SB, Tompkins JW, TeHiwi B. Call to action: A new path for improving diabetes care for Indigenous peoples, a global review. *Diabetes Res Clin Pract* 2017;**123**:120-133.
5. Australian Bureau of Statistics. Causes of Death, Australia. Canberra: ABS, 2020. Accessed via: <https://www.abs.gov.au/statistics/health/causes-death/causes-death-australia/2019> [Accessed 30 December 2020].
6. Australian Bureau of Statistics. *National Aboriginal and Torres Strait Islander Health Survey, 2018-19. Ref: 4715.0*. Canberra: ABS, 2019. Accessed via: <https://www.abs.gov.au/statistics/people/aboriginal-and-torres-strait-islander-peoples/national-aboriginal-and-torres-strait-islander-health-survey/2018-19> [Accessed 19 May 2020].
7. Minges KE, Zimmet P, Magliano DJ, Dunstan DW, Brown A, Shaw JE. Diabetes prevalence and determinants in Indigenous Australian populations: A systematic review. *Diabetes Res Clin Pract* 2011;**93**:139-49.
8. Northern Territory Government Department of Treasury and Finance. Northern Territory Economy - Population. Darwin: Northern Territory Government, 2020. Accessed via: <https://nteconomy.nt.gov.au/population> [Accessed 28 October 2020].
9. Northern Territory Government. Aboriginal languages in NT, 2018. Accessed via: <https://nt.gov.au/community/interpreting-and-translating-services/aboriginal-interpretation-service/aboriginal-languages-in-nt> [Accessed 18 August 2021].
10. Zhao Y, Connors C, Wright J, Guthridge S, Bailie R. Estimating chronic disease prevalence among the remote Aboriginal population of the Northern Territory using multiple data sources. *Aust N Z J Public Health* 2008;**32**:307-313.
11. Foley M, Zhao Y, Condon J. *Demographic data quality assessment for Northern Territory public hospitals 2011*. Darwin: Northern Territory Government Department of Health; 2012.
12. Li L, Guthridge S, Li SQ, Zhao Y, Lawton P, Cass A. Estimating the total prevalence and incidence of end-stage kidney disease among Aboriginal and non-Aboriginal populations in the Northern Territory of Australia, using multiple data sources. *BMC Nephrol* 2018;**19**:15.
13. Saeedi P, Petersohn I, Salpea P, et al. Global and regional diabetes prevalence estimates for 2019 and projections for 2030 and 2045: Results from the International Diabetes Federation Diabetes Atlas, 9(th) edition. *Diabetes Res Clin Pract* 2019;**157**:107843.

14. Munoz E, Powers JR, Nienhuys TG, Mathews JD. Social and environmental factors in 10 aboriginal communities in the Northern Territory: relationship to hospital admissions of children. *Med J Aust* 1992;**156**:529-533.
15. Magliano DJ, Sacre JW, Harding JL, Gregg EW, Zimmet PZ, Shaw JE. Young-onset type 2 diabetes mellitus - implications for morbidity and mortality. *Nat Rev Endocrinol* 2020;**16**:321-331.
16. Stratton IM, Adler AI, Neil HA, et al. Association of glycaemia with macrovascular and microvascular complications of type 2 diabetes (UKPDS 35): prospective observational study. *BMJ* 2000;**321**:405-412.
17. Daniel M, Rowley KG, McDermott R, O'Dea K. Diabetes and impaired glucose tolerance in Aboriginal Australians: prevalence and risk. *Diabetes Res Clin Pract* 2002;**57**:23-33.
18. Bennett PH, Burch TA, Miller M. Diabetes mellitus in American (Pima) Indians. *Lancet* 1971;**2**:125-128.
19. Dunstan DW, Zimmet PZ, Welborn TA, et al. The rising prevalence of diabetes and impaired glucose tolerance: the Australian Diabetes, Obesity and Lifestyle Study. *Diabetes Care* 2002;**25**:829-34.
20. Brimblecombe J, Mackerras D, Garnggulkpuy J, et al. Leanness and type 2 diabetes in a population of indigenous Australians. *Diabetes Res Clin Pract* 2006;**72**:93-99.
21. Dyck R, Osgood N, Lin TH, Gao A, Stang MR. Epidemiology of diabetes mellitus among First Nations and non-First Nations adults. *CMAJ* 2010;**182**:249-56.
22. Scavini M, Stidley CA, Shah VO, et al. Prevalence of diabetes is higher among female than male Zuni Indians. *Diabetes Care* 2003;**26**:55-60.
23. McDermott R, Rowley KG, Lee AJ, Knight S, O'Dea K. Increase in prevalence of obesity and diabetes and decrease in plasma cholesterol in a central Australian Aboriginal community. *Med J Aust* 2000;**172**:480-4.
24. Shields BM, Knight B, Hopper H, et al. Measurement of cord insulin and insulin-related peptides suggests that girls are more insulin resistant than boys at birth. *Diabetes Care* 2007;**30**:261-6.
25. Regnault N, Botton J, Heude B, et al. Higher cord C-peptide concentrations are associated with slower growth rate in the 1st year of life in girls but not in boys. *Diabetes* 2011;**60**:2152-9.
26. Australian Institute of Health and Welfare. Indigenous health checks and follow-ups. Cat. no. IHW 209. Canberra: AIHW, 2021. Accessed via <https://www.aihw.gov.au/reports/indigenous-australians/indigenous-health-checks-follow-ups/> [Accessed 27 September 2021].
27. Daniel M, Rowley KG, McDermott R, Mylvaganam A, O'Dea K. Diabetes incidence in an Australian aboriginal population. An 8-year follow-up study. *Diabetes Care* 1999;**22**:1993-8.
28. McDermott RA, Li M, Campbell SK. Incidence of type 2 diabetes in two Indigenous Australian populations: a 6-year follow-up study. *Med J Aust* 2010;**192**:562-5.
29. Magliano DJ, Chen L, Islam RM, et al. Multi-country analysis of trends in the incidence of diagnosed diabetes from 22 million diagnoses in higher-income settings. *Lancet Diabetes Endocrinol* 2021;**9**:203-11.

- 1  
2  
3 30. Davis WA, Peters KE, Makepeace A, et al. Prevalence of diabetes in Australia: insights from the  
4 Fremantle Diabetes Study Phase II. *Intern Med J* 2018;**48**:803-9.  
5  
6 31. Maple-Brown LJ, Hampton D. Indigenous cultures in countries with similar colonisation histories  
7 share the challenge of intergenerational diabetes. *Lancet Glob Health* 2020;**8**:e619-20.  
8  
9 32. Pearson ER. Dissecting the Etiology of Type 2 Diabetes in the Pima Indian Population. *Diabetes*  
10 2015;**64**:3993-5.  
11  
12 33. Hjort L, Novakovic B, Grunnet LG, et al. Diabetes in pregnancy and epigenetic mechanisms -  
13 how the first 9 months from conception may affect the child's epigenome and later risk of  
14 disease. *Lancet Diabetes Endocrinol* 2019;**7**:796-806.  
15  
16 34. Gluckman PD, Hanson MA, Cooper C, Thornburg KL. Effect of in utero and early-life conditions  
17 on adult health and disease. *N Engl J Med* 2008;**359**:61-73.  
18  
19 35. Hare MJL, Barzi F, Boyle JA, et al. Diabetes during pregnancy and birthweight trends among  
20 Aboriginal and non-Aboriginal people in the Northern Territory of Australia over 30 years. *The*  
21 *Lancet Regional Health - Western Pacific* 2020;**1**:100005.  
22  
23 36. O'Dea K, Traianedes K, Hopper JL, Larkins RG. Impaired glucose tolerance, hyperinsulinemia,  
24 and hypertriglyceridemia in Australian aborigines from the desert. *Diabetes Care* 1988;**11**:23-9.  
25  
26 37. Zhao Y, You J, Wright J, Guthridge SL, Lee AH. Health inequity in the Northern Territory,  
27 Australia. *Int J Equity Health* 2013;**12**:79.  
28  
29 38. Australian Indigenous HealthInfoNet. *Summary of nutrition among Aboriginal and Torres Strait*  
30 *Islander people*. Accessed via <https://healthinonet.ecu.edu.au/nutrition2020> [Accessed 2  
31 November 2020].  
32  
33  
34  
35  
36  
37  
38  
39  
40  
41  
42  
43  
44  
45  
46  
47  
48  
49  
50  
51  
52  
53  
54  
55  
56  
57  
58  
59  
60

**Table 1. Characteristics of Aboriginal people with prevalent diabetes in 2018/19 in the NT, with comparison by region**

|                                     | <b>Total NT<br/>(n=3477)</b> | <b>Central<br/>Australia<br/>(n=1382)</b> | <b>Top End<br/>(n=2095)</b> | <b>P value<br/>(CA vs TE)</b> |
|-------------------------------------|------------------------------|-------------------------------------------|-----------------------------|-------------------------------|
| <b>Age, years</b>                   | 49 (39-58)                   | 48 (37-58)                                | 49 (40-58)                  | 0.003                         |
| <b>Female</b>                       | 2115 (61)                    | 834 (60)                                  | 1281 (61)                   | 0.637                         |
| <b>Diabetes type</b>                |                              |                                           |                             | 0.269                         |
| Type 2                              | 3429 (98.6)                  | 1368 (98.9)                               | 2061 (98.4)                 |                               |
| Type 1                              | 34 (1.0)                     | 9 (0.7)                                   | 25 (1.2)                    |                               |
| Other                               | 14 (0.4)                     | 5 (0.5)                                   | 9 (0.4)                     |                               |
| <b>Treatment</b>                    |                              |                                           |                             |                               |
| No GLT                              | 1627 (47)                    | 542 (39)                                  | 1085 (52)                   | <0.001                        |
| Non-insulin GLT                     | 1181 (34)                    | 508 (37)                                  | 673 (32)                    | 0.005                         |
| Combined GLT<br>(with insulin)      | 610 (18)                     | 307 (22)                                  | 303 (15)                    | <0.001                        |
| Insulin alone                       | 59 (1.7)                     | 25 (1.8)                                  | 34 (1.6)                    | 0.678                         |
| <b>Mean HbA1c*</b>                  | 7.9 ( $\pm$ 2.2)             | 8.4 ( $\pm$ 0.07)                         | 7.7 ( $\pm$ 0.05)           | <0.001                        |
| <b>HbA1c category*</b>              |                              |                                           |                             | <0.001                        |
| <7.0%<br>(<53 mmol/mol)             | 1216 (35)                    | 375 (27)                                  | 641 (40)                    |                               |
| 7.0-7.9%<br>(53-63 mmol/mol)        | 415 (12)                     | 159 (12)                                  | 256 (12)                    |                               |
| 8.0-9.9%<br>(64-85 mmol/mol)        | 540 (16)                     | 228 (17)                                  | 312 (15)                    |                               |
| $\geq$ 10%<br>( $\geq$ 86 mmol/mol) | 567 (16)                     | 281 (20)                                  | 286 (14)                    |                               |
| No result                           | 739 (21)                     | 339 (25)                                  | 400 (19)                    |                               |

Data are n (%), median (IQR) or mean ( $\pm$ SE). CA = Central Australia, TE = Top End, GLT = glucose lowering therapy, HbA1c = haemoglobin A1c. \*The single most recent HbA1c result for each individual within the 2018/19 year was included. Individuals with no HbA1c in that 12 month period were excluded from calculation of means and reported in the "no result" category.

## Figure Legends

**Figure 1.** Map of the Top End (TE) and Central Australia (CA) regions of the Northern Territory, Australia, showing the 51 remote clinics (triangles) and 6 hospitals (crosses) contributing data to this study. Nb. There are two hospitals in the location at the top left (North West) of the Top End. Distances and locations are approximate.

**Figure 2.** Trend in crude diabetes prevalence among Aboriginal people (all ages) in remote NT communities over seven years. Error bars are 95% confidence intervals.

**Figure 3.** Age and sex-specific diabetes prevalence in 2018/19 among Aboriginal people in remote NT communities. Error bars are 95% confidence intervals.

**Figure 4.** Age-specific diabetes incidence rates between 2016/17 and 2018/19 among Aboriginal people in remote NT communities. Error bars are 95% confidence intervals.

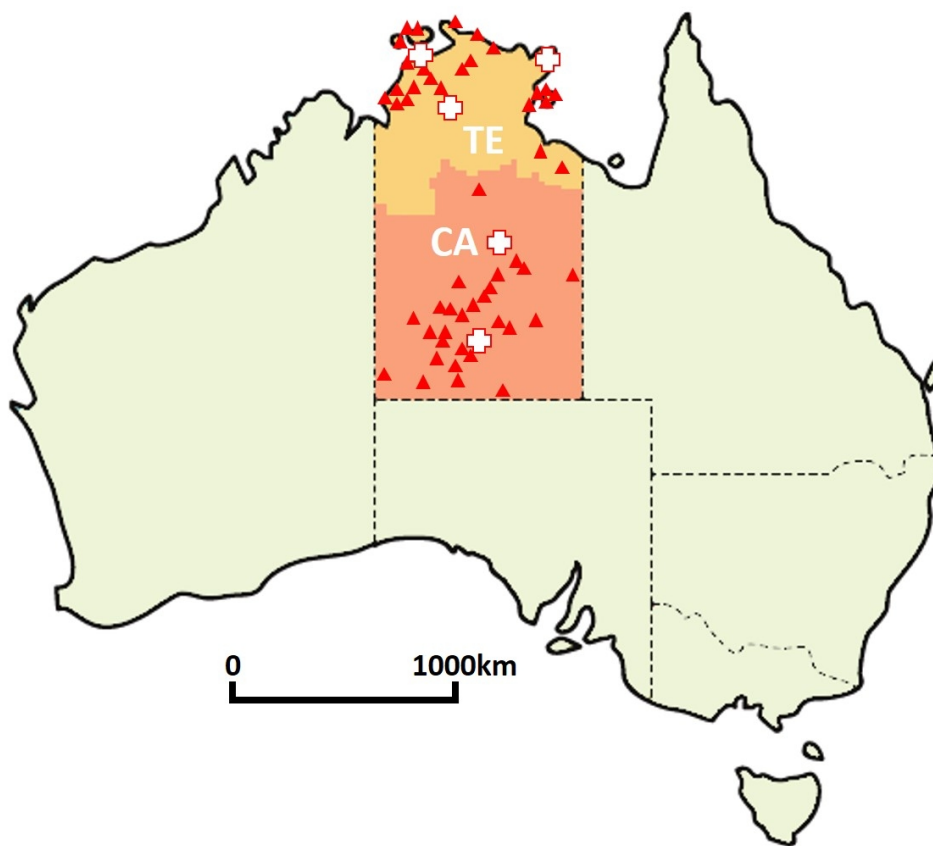

199x175mm (150 x 150 DPI)



1  
2  
3  
4  
5  
6  
7  
8  
9  
10  
11  
12  
13  
14  
15  
16  
17  
18  
19  
20  
21  
22  
23  
24  
25  
26  
27  
28  
29  
30  
31  
32  
33  
34  
35  
36  
37  
38  
39  
40  
41  
42  
43  
44  
45  
46  
47  
48  
49  
50  
51  
52  
53  
54  
55  
56  
57  
58  
59  
60

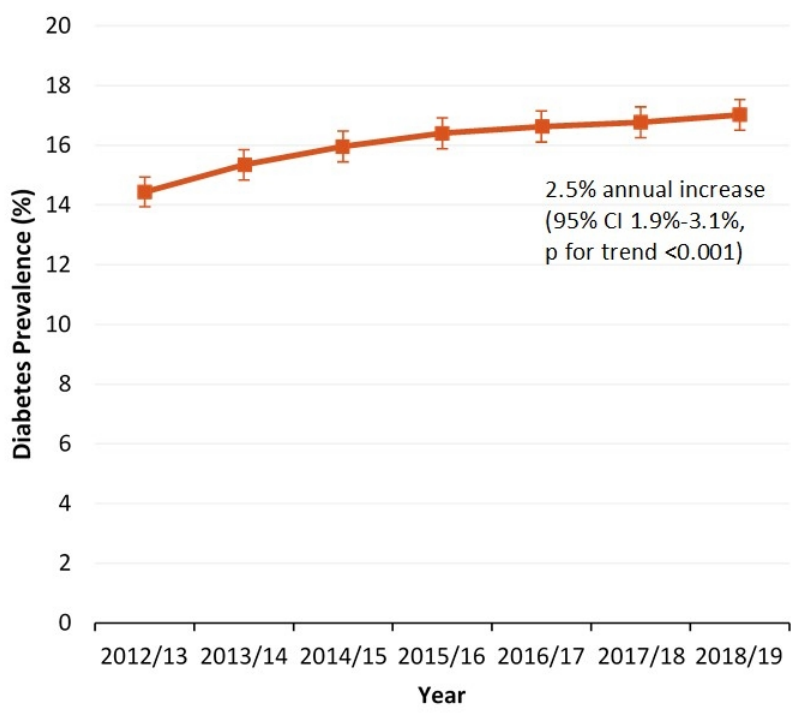

220x190mm (96 x 96 DPI)

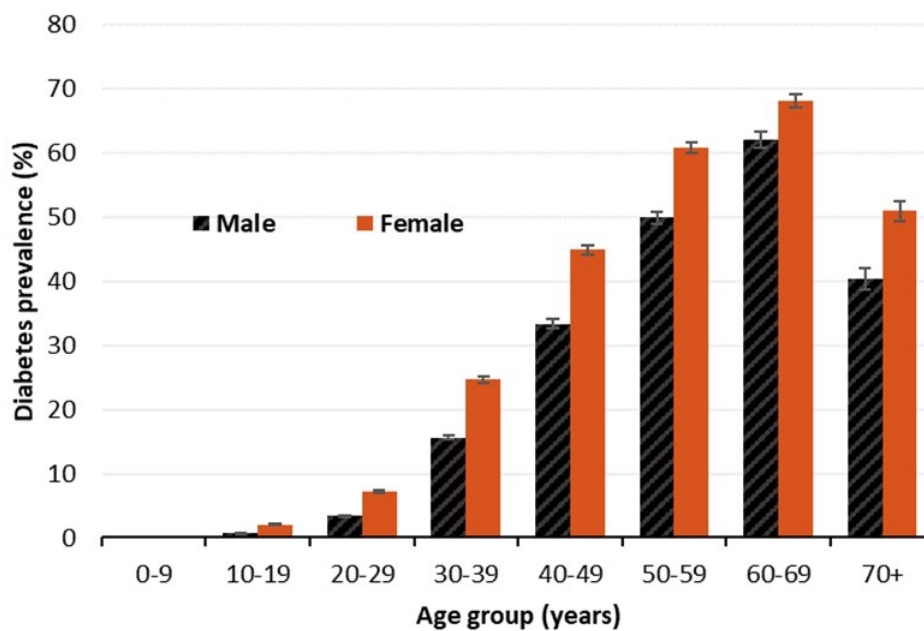

220x150mm (96 x 96 DPI)

1  
2  
3  
4  
5  
6  
7  
8  
9  
10  
11  
12  
13  
14  
15  
16  
17  
18  
19  
20  
21  
22  
23  
24  
25  
26  
27  
28  
29  
30  
31  
32  
33  
34  
35  
36  
37  
38  
39  
40  
41  
42  
43  
44  
45  
46  
47  
48  
49  
50  
51  
52  
53  
54  
55  
56  
57  
58  
59  
60

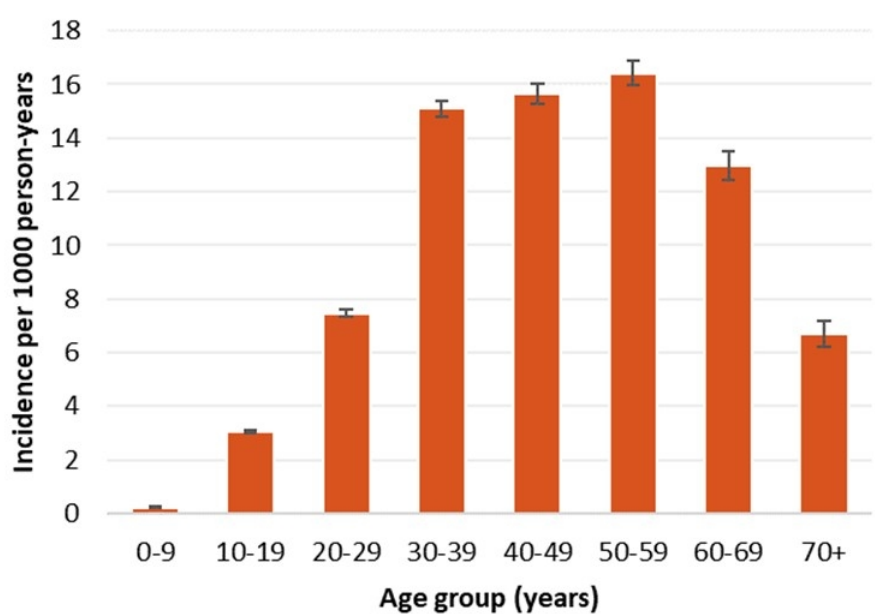

220x150mm (96 x 96 DPI)

## APPENDIX

Supplementary Table 1. ICPC and ICD-10-AM diagnostic codes used in diabetes case definitions

|                      | ICPC         | ICD-10-AM                                  |
|----------------------|--------------|--------------------------------------------|
| Any diabetes         | T89*<br>T90* | E10*-E14*<br>O24.0-O24.3<br>O24.5<br>O24.9 |
| Type 1 diabetes      | T89002       | E10*<br>O24.0                              |
| Other diabetes       | T90017       | E13*                                       |
| Gestational diabetes | W85*         | O24.4                                      |

\* indicates truncation. ICPC: International Classification of Primary Care; ICD-10-AM: International Classification of Diseases, Tenth Revision, Australian Modification.

## Validation study results

Manual review of individual electronic health records was undertaken to inform our study definition of diabetes. Three specific potential issues were targeted including: (i) whether or not prescription of metformin indicates a diagnosis of diabetes, (ii) whether cases of gestational diabetes mellitus (GDM) were adequately excluded, and (iii) the accuracy of determination of diabetes type, especially in young-onset diabetes. This work was undertaken by a single research assistant with a clinical background under the supervision of an endocrinologist, who personally reviewed all records where there was any doubt about the patient's diabetes diagnosis.

Metformin prescription was removed from the study definition of diabetes following manual review of a sample (n=62) of people prescribed metformin but with no other glucose-lowering medication, no coding for a diabetes diagnosis and no biochemical data to support a diabetes diagnosis. Of these people, 52 (81%) did not have diabetes. The most common indication for metformin in this subgroup was diabetes prevention in high-risk individuals (including pre-diabetes, evidence of insulin resistance and antipsychotic use), followed by GDM and polycystic ovarian syndrome.

To avoid including diagnoses of GDM, we excluded all medication and biochemistry data in the nine months preceding and three months following the allocation of a GDM diagnostic code in either the primary care or hospital datasets. In order to assess this approach, we investigated the health records of a random sample of women (n=40) of childbearing age (born between 1<sup>st</sup> July 1968 and 1<sup>st</sup> July 1998) who had been defined as having diabetes. Once metformin had been removed from the study definition of diabetes, 39 (98%) of these women were confirmed as having established diabetes. Therefore, we deemed that the approach to excluding GDM was adequate.

With regard to determining diabetes type, we were concerned about two non-specific ICPC codes (T89001 – "Insulin dependent" and T89003 – "Juvenile onset") intended to report type 1 diabetes in the ICPC classification system. Insulin is frequently used for type 2 diabetes and there is a high burden of youth-onset type 2 diabetes among Aboriginal people in the Northern Territory. In a random sample (n=28), only 4 (14%) of people coded as T89001 had type 1 diabetes, therefore we did not include this code in our type 1 diabetes definition. Only two people were assigned the

1  
2  
3 T89003 code. One of these had type 2 diabetes, the other had pre-diabetes. This code was also  
4 removed from the type 1 diabetes definition.  
5

6 To further assess the accuracy of identification of diabetes type in young people, we took a random  
7 sample (n=40) of people with diabetes born on or after 1<sup>st</sup> July 1988. Only one of these people had  
8 type 1 diabetes and it had been coded appropriately in the study dataset.  
9  
10  
11  
12  
13  
14  
15  
16  
17  
18  
19  
20  
21  
22  
23  
24  
25  
26  
27  
28  
29  
30  
31  
32  
33  
34  
35  
36  
37  
38  
39  
40  
41  
42  
43  
44  
45  
46  
47  
48  
49  
50  
51  
52  
53  
54  
55  
56  
57  
58  
59  
60

For peer review only

## STROBE Statement—checklist of items that should be included in reports of observational studies

|                              | Item No | Recommendation                                                                                                                                                                                                                                                                                                                                                                                                                                                         | Page No          |
|------------------------------|---------|------------------------------------------------------------------------------------------------------------------------------------------------------------------------------------------------------------------------------------------------------------------------------------------------------------------------------------------------------------------------------------------------------------------------------------------------------------------------|------------------|
| <b>Title and abstract</b>    | 1       | (a) Indicate the study's design with a commonly used term in the title or the abstract                                                                                                                                                                                                                                                                                                                                                                                 | 1,2              |
|                              |         | (b) Provide in the abstract an informative and balanced summary of what was done and what was found                                                                                                                                                                                                                                                                                                                                                                    | 2                |
| <b>Introduction</b>          |         |                                                                                                                                                                                                                                                                                                                                                                                                                                                                        |                  |
| Background/rationale         | 2       | Explain the scientific background and rationale for the investigation being reported                                                                                                                                                                                                                                                                                                                                                                                   | 4                |
| Objectives                   | 3       | State specific objectives, including any prespecified hypotheses                                                                                                                                                                                                                                                                                                                                                                                                       | 5                |
| <b>Methods</b>               |         |                                                                                                                                                                                                                                                                                                                                                                                                                                                                        |                  |
| Study design                 | 4       | Present key elements of study design early in the paper                                                                                                                                                                                                                                                                                                                                                                                                                | 5                |
| Setting                      | 5       | Describe the setting, locations, and relevant dates, including periods of recruitment, exposure, follow-up, and data collection                                                                                                                                                                                                                                                                                                                                        | 5-6              |
| Participants                 | 6       | (a) <i>Cohort study</i> —Give the eligibility criteria, and the sources and methods of selection of participants. Describe methods of follow-up<br><i>Case-control study</i> —Give the eligibility criteria, and the sources and methods of case ascertainment and control selection. Give the rationale for the choice of cases and controls<br><i>Cross-sectional study</i> —Give the eligibility criteria, and the sources and methods of selection of participants | 5-6              |
|                              |         | (b) <i>Cohort study</i> —For matched studies, give matching criteria and number of exposed and unexposed<br><i>Case-control study</i> —For matched studies, give matching criteria and the number of controls per case                                                                                                                                                                                                                                                 | NA               |
| Variables                    | 7       | Clearly define all outcomes, exposures, predictors, potential confounders, and effect modifiers. Give diagnostic criteria, if applicable                                                                                                                                                                                                                                                                                                                               | 6                |
| Data sources/<br>measurement | 8*      | For each variable of interest, give sources of data and details of methods of assessment (measurement). Describe comparability of assessment methods if there is more than one group                                                                                                                                                                                                                                                                                   | 6<br>(+appendix) |
| Bias                         | 9       | Describe any efforts to address potential sources of bias                                                                                                                                                                                                                                                                                                                                                                                                              | 5,13             |
| Study size                   | 10      | Explain how the study size was arrived at                                                                                                                                                                                                                                                                                                                                                                                                                              | 5                |
| Quantitative variables       | 11      | Explain how quantitative variables were handled in the analyses. If applicable, describe which groupings were chosen and why                                                                                                                                                                                                                                                                                                                                           | 7                |
| Statistical methods          | 12      | (a) Describe all statistical methods, including those used to control for confounding                                                                                                                                                                                                                                                                                                                                                                                  | 7                |
|                              |         | (b) Describe any methods used to examine subgroups and interactions                                                                                                                                                                                                                                                                                                                                                                                                    | 7                |
|                              |         | (c) Explain how missing data were addressed                                                                                                                                                                                                                                                                                                                                                                                                                            | 19               |
|                              |         | (d) <i>Cohort study</i> —If applicable, explain how loss to follow-up was addressed<br><i>Case-control study</i> —If applicable, explain how matching of cases and controls was addressed<br><i>Cross-sectional study</i> —If applicable, describe analytical methods taking account of sampling strategy                                                                                                                                                              | NA               |
|                              |         | (e) Describe any sensitivity analyses                                                                                                                                                                                                                                                                                                                                                                                                                                  | NA               |

Continued on next page

| <b>Results</b>           |     |                                                                                                                                                                                                              |     |
|--------------------------|-----|--------------------------------------------------------------------------------------------------------------------------------------------------------------------------------------------------------------|-----|
| Participants             | 13* | (a) Report numbers of individuals at each stage of study—eg numbers potentially eligible, examined for eligibility, confirmed eligible, included in the study, completing follow-up, and analysed            | 8   |
|                          |     | (b) Give reasons for non-participation at each stage                                                                                                                                                         | NA  |
|                          |     | (c) Consider use of a flow diagram                                                                                                                                                                           | NA  |
| Descriptive data         | 14* | (a) Give characteristics of study participants (eg demographic, clinical, social) and information on exposures and potential confounders                                                                     | 8   |
|                          |     | (b) Indicate number of participants with missing data for each variable of interest                                                                                                                          | 19  |
|                          |     | (c) <i>Cohort study</i> —Summarise follow-up time (eg, average and total amount)                                                                                                                             | NA  |
| Outcome data             | 15* | <i>Cohort study</i> —Report numbers of outcome events or summary measures over time                                                                                                                          | 8,9 |
|                          |     | <i>Case-control study</i> —Report numbers in each exposure category, or summary measures of exposure                                                                                                         |     |
|                          |     | <i>Cross-sectional study</i> —Report numbers of outcome events or summary measures                                                                                                                           |     |
| Main results             | 16  | (a) Give unadjusted estimates and, if applicable, confounder-adjusted estimates and their precision (eg, 95% confidence interval). Make clear which confounders were adjusted for and why they were included | 8,9 |
|                          |     | (b) Report category boundaries when continuous variables were categorized                                                                                                                                    | 19  |
|                          |     | (c) If relevant, consider translating estimates of relative risk into absolute risk for a meaningful time period                                                                                             | NA  |
| Other analyses           | 17  | Report other analyses done—eg analyses of subgroups and interactions, and sensitivity analyses                                                                                                               | 8   |
| <b>Discussion</b>        |     |                                                                                                                                                                                                              |     |
| Key results              | 18  | Summarise key results with reference to study objectives                                                                                                                                                     | 9   |
| Limitations              | 19  | Discuss limitations of the study, taking into account sources of potential bias or imprecision. Discuss both direction and magnitude of any potential bias                                                   | 13  |
| Interpretation           | 20  | Give a cautious overall interpretation of results considering objectives, limitations, multiplicity of analyses, results from similar studies, and other relevant evidence                                   | 14  |
| Generalisability         | 21  | Discuss the generalisability (external validity) of the study results                                                                                                                                        | 13  |
| <b>Other information</b> |     |                                                                                                                                                                                                              |     |
| Funding                  | 22  | Give the source of funding and the role of the funders for the present study and, if applicable, for the original study on which the present article is based                                                | 15  |

\*Give information separately for cases and controls in case-control studies and, if applicable, for exposed and unexposed groups in cohort and cross-sectional studies.

**Note:** An Explanation and Elaboration article discusses each checklist item and gives methodological background and published examples of transparent reporting. The STROBE checklist is best used in conjunction with this article (freely available on the Web sites of PLoS Medicine at <http://www.plosmedicine.org/>, Annals of Internal Medicine at <http://www.annals.org/>, and Epidemiology at <http://www.epidem.com/>). Information on the STROBE Initiative is available at [www.strobe-statement.org](http://www.strobe-statement.org).

# BMJ Open

## Prevalence and incidence of diabetes among Aboriginal people in remote communities of the Northern Territory, Australia: a retrospective, longitudinal data-linkage study

|                                 |                                                                                                                                                                                                                                                                                                                                                                                                                                                                                                                                                                                                                                                                                                                                                                                                                                                                                                                                                                                                                                                |
|---------------------------------|------------------------------------------------------------------------------------------------------------------------------------------------------------------------------------------------------------------------------------------------------------------------------------------------------------------------------------------------------------------------------------------------------------------------------------------------------------------------------------------------------------------------------------------------------------------------------------------------------------------------------------------------------------------------------------------------------------------------------------------------------------------------------------------------------------------------------------------------------------------------------------------------------------------------------------------------------------------------------------------------------------------------------------------------|
| Journal:                        | <i>BMJ Open</i>                                                                                                                                                                                                                                                                                                                                                                                                                                                                                                                                                                                                                                                                                                                                                                                                                                                                                                                                                                                                                                |
| Manuscript ID                   | bmjopen-2021-059716.R1                                                                                                                                                                                                                                                                                                                                                                                                                                                                                                                                                                                                                                                                                                                                                                                                                                                                                                                                                                                                                         |
| Article Type:                   | Original research                                                                                                                                                                                                                                                                                                                                                                                                                                                                                                                                                                                                                                                                                                                                                                                                                                                                                                                                                                                                                              |
| Date Submitted by the Author:   | 07-Mar-2022                                                                                                                                                                                                                                                                                                                                                                                                                                                                                                                                                                                                                                                                                                                                                                                                                                                                                                                                                                                                                                    |
| Complete List of Authors:       | Hare, Matthew; Charles Darwin University, Menzies School of Health Research; Royal Darwin Hospital, Department of Endocrinology<br>Zhao, Yuejen; NT Health, Population and Digital Health<br>Guthridge, Steven; Charles Darwin University, Menzies School of Health Research<br>Burgess, Paul; NT Health, Population and Digital Health; Top End Region, NT Health, Primary Health Care Division<br>Barr, Elizabeth L. M.; Charles Darwin University, Menzies School of Health Research; Baker Heart and Diabetes Institute, Clinical Diabetes and Epidemiology<br>Ellis, Elna; Alice Springs Hospital, Department of Medicine<br>Butler, Deborah; NT Health<br>Rosser, Amy; Central Australia Region, NT Health, Primary Health Care Division<br>Falhammar, Henrik; Karolinska Institutet, Department of Molecular Medicine and Surgery; Karolinska University Hospital, Department of Endocrinology<br>Maple-Brown, Louise; Charles Darwin University, Menzies School of Health Research; Royal Darwin Hospital, Department of Endocrinology |
| <b>Primary Subject Heading</b>: | Diabetes and endocrinology                                                                                                                                                                                                                                                                                                                                                                                                                                                                                                                                                                                                                                                                                                                                                                                                                                                                                                                                                                                                                     |
| Secondary Subject Heading:      | Epidemiology, Global health, Public health                                                                                                                                                                                                                                                                                                                                                                                                                                                                                                                                                                                                                                                                                                                                                                                                                                                                                                                                                                                                     |
| Keywords:                       | General diabetes < DIABETES & ENDOCRINOLOGY, EPIDEMIOLOGY, PUBLIC HEALTH                                                                                                                                                                                                                                                                                                                                                                                                                                                                                                                                                                                                                                                                                                                                                                                                                                                                                                                                                                       |
|                                 |                                                                                                                                                                                                                                                                                                                                                                                                                                                                                                                                                                                                                                                                                                                                                                                                                                                                                                                                                                                                                                                |

SCHOLARONE™  
Manuscripts





I, the Submitting Author has the right to grant and does grant on behalf of all authors of the Work (as defined in the below author licence), an exclusive licence and/or a non-exclusive licence for contributions from authors who are: i) UK Crown employees; ii) where BMJ has agreed a CC-BY licence shall apply, and/or iii) in accordance with the terms applicable for US Federal Government officers or employees acting as part of their official duties; on a worldwide, perpetual, irrevocable, royalty-free basis to BMJ Publishing Group Ltd ("BMJ") its licensees and where the relevant Journal is co-owned by BMJ to the co-owners of the Journal, to publish the Work in this journal and any other BMJ products and to exploit all rights, as set out in our [licence](#).

The Submitting Author accepts and understands that any supply made under these terms is made by BMJ to the Submitting Author unless you are acting as an employee on behalf of your employer or a postgraduate student of an affiliated institution which is paying any applicable article publishing charge ("APC") for Open Access articles. Where the Submitting Author wishes to make the Work available on an Open Access basis (and intends to pay the relevant APC), the terms of reuse of such Open Access shall be governed by a Creative Commons licence – details of these licences and which [Creative Commons](#) licence will apply to this Work are set out in our licence referred to above.

Other than as permitted in any relevant BMJ Author's Self Archiving Policies, I confirm this Work has not been accepted for publication elsewhere, is not being considered for publication elsewhere and does not duplicate material already published. I confirm all authors consent to publication of this Work and authorise the granting of this licence.

1  
2  
3 **Prevalence and incidence of diabetes among Aboriginal people in remote communities of the**  
4 **Northern Territory, Australia: a retrospective, longitudinal data-linkage study**  
5  
6  
7

8 **Author names and affiliations:**

9 Matthew J. L. Hare<sup>a,b</sup>

10 Yuejen Zhao<sup>c</sup>

11 Steven Guthridge<sup>a</sup>

12 Paul Burgess<sup>c,d</sup>

13 Elizabeth L. M. Barr<sup>a,e</sup>

14 Elna Ellis<sup>f</sup>

15 Deborah Butler<sup>g</sup>

16 Amy Rosser<sup>h</sup>

17 Henrik Falhammar<sup>a,b,i,j\*</sup>

18 Louise J. Maple-Brown<sup>a,b\*</sup>

19  
20  
21 *\*Joint senior authors*  
22

23 a) Menzies School of Health Research, Charles Darwin University, Darwin, Northern Territory,  
24 Australia

25 b) Department of Endocrinology, Royal Darwin Hospital, Darwin, Northern Territory, Australia

26 c) Population and Digital Health, NT Health, Darwin, Northern Territory, Australia

27 d) Primary Health Care Division, Top End Region, NT Health, Darwin, Northern Territory, Australia

28 e) Clinical Diabetes and Epidemiology, Baker Heart and Diabetes Institute, Melbourne, Victoria,  
29 Australia

30 f) Department of Medicine, Alice Springs Hospital, Alice Springs, Northern Territory, Australia

31 g) NT Health, Northern Territory Government, Darwin, Northern Territory, Australia

32 h) Primary Health Care Division, Central Australia Region, NT Health, Alice Springs, Northern  
33 Territory, Australia

34 i) Department of Molecular Medicine and Surgery, Karolinska Institutet, Karolinska University  
35 Hospital, Stockholm, Sweden

36 j) Department of Endocrinology, Karolinska University Hospital, Stockholm, Sweden.  
37  
38  
39  
40

41 **Corresponding Author:**

42 Dr Matthew Hare

43 Menzies School of Health Research

44 PO Box 41096, Casuarina, NT, 0811, Australia. matthew.hare@menzies.edu.au

45 T: + 61 8 8946 8616  
46  
47  
48  
49  
50  
51  
52  
53  
54  
55  
56  
57  
58  
59  
60

## Abstract

**Objectives:** To assess the prevalence and incidence of diabetes among Aboriginal peoples in remote communities of the Northern Territory (NT), Australia.

**Design:** Retrospective cohort analysis of linked clinical and administrative datasets from 1<sup>st</sup> July 2012 to 30<sup>th</sup> June 2019.

**Setting:** Remote health centres using the NT Government Primary Care Information System (51 out of a total of 84 remote health centres in the NT).

**Participants:** All Aboriginal clients residing in remote communities serviced by these health centres (N=21 267).

**Primary outcome measures:** Diabetes diagnoses were established using hospital and primary care coding, biochemistry and prescription data.

**Results:** Diabetes prevalence across all ages increased from 14.4% (95% CI: 13.9-14.9%) to 17.0% (95% CI: 16.5-17.5%) over seven years. Among adults ( $\geq 20$  years), the 2018/19 diabetes prevalence was 28.6% (95% CI: 27.8-29.4%), being higher in Central Australia (39.5%, 95% CI: 37.8-41.1%) compared to the Top End region (24.2%, 95% CI: 23.3-25.1%,  $p < 0.001$ ). Between 2016/17 and 2018/19, diabetes incidence across all ages was 7.9 per 1000 person-years (95% CI: 7.3-8.7 per 1000 person-years). The adult incidence of diabetes was 12.6 per 1000 person-years (95% CI: 11.5-13.8 per 1000 person-years).

**Conclusions:** The burden of diabetes in the remote Aboriginal population of the NT is among the highest in the world. Strengthened systems of care and public health prevention strategies, developed in partnership with Aboriginal communities, are needed.

### Strengths and limitations of this study

- This study describes the burden of diabetes among Aboriginal peoples in the Northern Territory, Australia, who represent some of the world's longest surviving cultures but experience substantial health and social inequality compared to the broader Australian population.
- The large sample size and use of detailed, individual-level data with a robust data-linkage methodology provide reliable epidemiological estimates in a context where traditional observational studies are immensely challenging, not least due to the population being dispersed over such a vast geographic area.
- The retrospective approach relies on existing clinical data, so the prevalence and incidence of diabetes may be underestimated due to incomplete screening.
- Our findings are unlikely to be generalisable to Aboriginal peoples living in urban centres.

## Introduction

Diabetes is a major cause of morbidity and premature mortality worldwide. Prevalence rates of type 2 diabetes and obesity have increased in recent decades due to factors such as globalisation and urbanisation, which are accompanied by sedentary behaviour and energy-dense diets.<sup>1,2</sup> Accompanying these factors, there is growing interest in the role of epigenetic mechanisms and the intrauterine environment as drivers of intergenerational diabetes and obesity risk.<sup>2</sup> The increasing prevalence of diabetes is also contributed to by ageing of populations and improved survival with the condition.<sup>1-3</sup>

Unlike type 1 diabetes, which is caused by insulin deficiency due to autoimmune-mediated pancreatic beta-cell failure, type 2 diabetes is characterised by insulin resistance and a degree of beta-cell dysfunction.<sup>4</sup> Indigenous populations are disproportionately affected by type 2 diabetes and associated complications.<sup>5</sup> Social determinants of health are likely key contributors.<sup>5</sup> In Australia, diabetes was the third leading cause of death for Aboriginal and Torres Strait Islander peoples in 2019.<sup>6</sup> The 2018-19 National Aboriginal and Torres Strait Islander Health Survey estimated a diabetes prevalence of 8% among all ages, being higher (12%) in remote areas.<sup>7</sup> These self-reported data are an underestimation. There is also geographic variability, with prevalence rates up to 33% previously reported in specific communities.<sup>8</sup>

The Northern Territory (NT) of Australia spans a vast area of 1.35 million km<sup>2</sup> (more than twice the area of France) with a population density of just 0.2 people/km<sup>2</sup>.<sup>9</sup> Over 30% of the population identify as Aboriginal people, 77% of whom live in remote or very remote areas.<sup>9</sup> Some areas of the NT were less impacted by colonisation until the mid-20<sup>th</sup> century and there remains great strength and diversity of culture, with more than 100 Aboriginal languages still spoken.<sup>10</sup> The NT is commonly considered in two broad regions, the Top End and Central Australia. In 2005, the prevalence of

1  
2  
3 diabetes among Aboriginal people was estimated at 16% in Central Australia and 7.7% in the Top  
4  
5 End.<sup>11</sup> More recent accurate estimates of the diabetes burden are lacking.  
6  
7  
8  
9

10 In this context, we examined trends in diabetes prevalence, contemporary diabetes incidence rates,  
11  
12 and the demographic and clinical characteristics of people with diabetes among Aboriginal peoples  
13  
14 in remote communities across the NT.  
15  
16  
17  
18  
19  
20

## 21 **Methods**

### 22 *Study population*

23  
24  
25 The study included all Aboriginal clients, who were recorded as being local residents, of all remote  
26  
27 health centres using the NT Health Primary Care Information System. This electronic medical record  
28  
29 system is used in 51 out of 84 remote health services in the NT (approximate locations shown in Fig.  
30  
31 1). Each of these health services are in locations defined as either remote or very remote according  
32  
33 to the Australian Statistical Geography Standard.<sup>12</sup> These remoteness classifications are based on  
34  
35 relative accessibility to services in urban centres according to road distance measurements. As the  
36  
37 clinics are sole service providers in these communities, almost all the local population are clients. To  
38  
39 have been included, an individual must have had an interaction with a clinic since 1<sup>st</sup> July 2007.  
40  
41 Births and deaths are updated monthly by relevant government agencies. Additionally, client lists  
42  
43 are updated every six months in collaboration with local community members to account for  
44  
45 population mobility. Aboriginal ethnicity is self-identified in NT Health records. A 2011 validation  
46  
47 study showed 98% concordance between Aboriginal identification in health records and findings  
48  
49 from interviews.<sup>13</sup>  
50  
51  
52  
53  
54  
55  
56  
57  
58

### 59 *Study design*

1  
2  
3 A retrospective cohort analysis of linked clinical and administrative data from 1<sup>st</sup> July 2012 to 30<sup>th</sup>  
4  
5 June 2019 was performed.  
6  
7  
8  
9

#### 10 *Data sources*

11  
12 Deidentified data were from the NT Health Primary Care Information System (PCIS) and the Hospital  
13  
14 Inpatient Activity dataset. Individual level records were deterministically linked using a unique  
15  
16 identifier, the Hospital Reference Number (HRN), which is used across all NT Health services. The  
17  
18 HRN and other personal identifiers are routinely stored in a centralised Client Master Index, which  
19  
20 connects to and synchronises across various NT Health information systems, including both PCIS and  
21  
22 the Hospital Inpatient Activity dataset. The Client Master Index is subject to continual audit and  
23  
24 review and is deemed reliable for deterministic linkage in research.<sup>13,14</sup> Implementation of PCIS  
25  
26 commenced in 2004 and was completed by 2010. Data for this study included demographics,  
27  
28 community 'resident' or 'visitor' status, International Classification of Primary Care (ICPC) coded  
29  
30 diagnoses, medication prescriptions, biochemistry results and date of death. The Hospital Inpatient  
31  
32 Activity dataset provided International Classification of Diseases, Tenth Revision, Australian  
33  
34 Modification (ICD-10-AM) codes for principal and secondary diagnoses for inpatient admissions to  
35  
36 the NT's six public hospitals during the study period and date of death from discharge coding.  
37  
38  
39  
40  
41  
42

#### 43 *Outcome definitions*

44  
45 Individuals meeting any of the following criteria were considered to have diabetes: (i) coding for  
46  
47 diabetes in primary care (ICPC) or hospital (ICD-10-AM) data, (ii) prescription of a diabetes  
48  
49 medication according to Anatomical Therapeutic Chemical (ATC) classification code A10 other than  
50  
51 metformin, and/or (iii) biochemical evidence of diabetes on at least two occasions. Details of ICPC  
52  
53 and ICD-10-AM inclusions are in Supplementary Table 1. Metformin was excluded from the diabetes  
54  
55 definition as it is commonly used for other indications, including polycystic ovarian syndrome and  
56  
57 "pre-diabetes". Our case ascertainment was informed by a manual validation study of individual  
58  
59  
60

1  
2  
3 patient records (details in Appendix). Biochemical criteria included haemoglobin A1c (HbA1c)  $\geq 6.5\%$   
4 ( $\geq 48$  mmol/mol), fasting plasma glucose  $\geq 7.0$  mmol/L, 2-hour plasma glucose  $\geq 11.1$  mmol/L, and/or  
5  
6 random capillary or plasma glucose  $\geq 11.1$  mmol/L.<sup>15</sup> In order to avoid inclusion of gestational  
7  
8 diabetes mellitus (GDM), data were excluded for nine months prior and three months following a  
9  
10 diagnosis code for GDM in either the primary care or hospital datasets. Type 1 and “other” diabetes  
11  
12 were identified using ICD-10-AM and ICPC coding. People with diabetes, not identified as type 1 or  
13  
14 “other”, were presumed to have type 2. If a person was assigned conflicting codes relating to  
15  
16 diabetes type (n=39), their clinical records were manually reviewed and diabetes type adjudicated  
17  
18 based on documentation by their treating clinicians and relevant investigations.  
19  
20  
21  
22  
23  
24

### 25 *Statistical analysis*

26  
27 Descriptive statistics were calculated for the total study population, people with prevalent diabetes  
28  
29 and people with incident diabetes. Annual diabetes prevalence (%) was calculated for the total  
30  
31 population for each financial year (1<sup>st</sup> July to 30<sup>th</sup> June) between 2012/13 and 2018/19, with 95%  
32  
33 confidence intervals calculated using:  $\hat{p} \pm 1.96 \sqrt{\frac{\hat{p}(1-\hat{p})}{n}}$ . Current prevalence (2018/19) was stratified  
34  
35 by sex and decade of age and also calculated for adults, defined as  $\geq 20$  years old for consistency with  
36  
37 the International Diabetes Federation Diabetes Atlas.<sup>16</sup> Trends in prevalence over time were  
38  
39 assessed using negative binomial regression. Subgroup analyses of the Top End and Central Australia  
40  
41 regions were performed for 2018/19 due to known demographic and epidemiological differences  
42  
43 between these populations.<sup>11,17</sup> Comparisons between regions were performed using the Pearson  
44  
45 chi-square test, nonparametric equality-of-medians test and unpaired t-test as appropriate.  
46  
47  
48  
49  
50

51  
52  
53 Due to smaller numbers, diabetes incidence was assessed in aggregate over a three-year period  
54  
55 (2016/17 to 2018/19). Trends in incidence over time were not assessed. A diagnosis was considered  
56  
57 incident when a person was first recorded as meeting the study criteria for diabetes and that person  
58  
59 had records available within the preceding five years with no evidence of diabetes.  
60



1  
2  
3  
4  
5 All analyses were performed in Stata (Version SE16.1, StataCorp, Texas).  
6  
7  
8  
9

### 10 *Patient and public involvement*

11 Interpretation and reporting of the study findings involved Aboriginal people living in the NT,  
12 including two of the authorship group and a third contributor, who requested to remain anonymous.  
13  
14 Wider dissemination and communication of the research findings back to Aboriginal communities in  
15 the NT and the development of future translational work to address the public health concerns  
16 raised in this study will be guided by the Aboriginal and Torres Strait Islander Advisory Group of the  
17 Diabetes across the Lifecourse: Northern Australia Partnership.  
18  
19  
20  
21  
22  
23  
24  
25  
26  
27

### 28 *Ethics*

29 The study was approved by the Human Research Ethics Committee of Northern Territory  
30 Department of Health and Menzies School of Health Research (Ref: 2016-2675).  
31  
32  
33  
34  
35  
36  
37  
38

### 39 **Results**

40  
41  
42  
43 Over seven years, 21 267 Aboriginal people from 51 remote communities across the NT were  
44 included. Median age at baseline was 22 (IQR 9-39) years, 10 902 (51.3%) were women, 15 035  
45 (70.7%) were from the Top End and 1059 (5.0%) died during the study period. In the 2012/13  
46 financial year, 14.4% (95% CI: 13.9%-14.9%, n/N=2749/19 042) of people had diabetes. By 2018/19  
47 this prevalence had increased to 17.0% (95% CI: 16.5%-17.5%, n/N=3477/20 429), with 98.6%  
48 (n/N=3429/3477) of diagnoses classified as type 2 diabetes. Figure 2 depicts the 18% increase in  
49 prevalence over the study period (annual increase 2.5%, 95% CI: 1.9%-3.1%, p<0.001). In 2018/19,  
50 the prevalence among adults was 28.6% (95% CI: 27.8%-29.4%, n/N=3414/11 939). Figure 3 shows  
51  
52  
53  
54  
55  
56  
57  
58  
59  
60

1  
2  
3 that diabetes prevalence was higher with increasing age, except in the oldest age-group ( $\geq 70$  years),  
4  
5 and that there were more women than men with diabetes in all age-groups.  
6  
7  
8  
9

10 In 2018/19, diabetes was more prevalent across all ages in Central Australia (23.0%, 95% CI: 22.0%-  
11 24.1%) than the Top End (14.5%, 95% CI: 13.9%-15.1%,  $p < 0.001$ ). When restricted to adults, the  
12 prevalence was 39.5% (95% CI: 37.9%-41.1%) in Central Australia compared to 24.2% (95% CI:  
13 23.3%-25.1%) in the Top End ( $p < 0.001$ ). Characteristics of all people with diabetes in 2018/19 are  
14 presented in Table 1. Among these, 2115 (60.8%) were women, 669 (19.2%) were prescribed insulin  
15 and 567 (16.3%) had HbA1c  $\geq 10\%$  ( $\geq 86$  mmol/mol). In Central Australia, a greater proportion of  
16 people had an HbA1c  $\geq 10\%$  ( $\geq 86$  mmol/mol) and rates of insulin prescribing were higher than in the  
17 Top End (both  $p < 0.001$ ).  
18  
19  
20  
21  
22  
23  
24  
25  
26  
27  
28  
29

30 Between July 2016 and June 2019, there were 483 new cases of diabetes. The incidence rate in the  
31 total population was 7.9 (95% CI: 7.3-8.7) per 1000 person-years. Age-specific incidence rates are  
32 presented in Figure 4. Median age at diabetes diagnosis was 38 (IQR 29-49) years. The peak  
33 incidence was among 50-59 year-olds (16.4 [95% CI: 15.9-16.9] per 1000 person-years), with  
34 similarly high rates among 30-39 and 40-49 year-olds. Among adults, the incidence rate was 12.6  
35 (95% CI: 11.5-13.8) per 1000 person-years. Of all people with incident diabetes, 287 (59.4%) were  
36 female, 328 (67.9%) lived in the Top End and 481 (99.6%) had type 2 diabetes.  
37  
38  
39  
40  
41  
42  
43  
44  
45  
46  
47  
48  
49

## 50 Discussion

51  
52  
53

54 The burden of type 2 diabetes among Aboriginal people in remote communities of the NT, Australia,  
55 is immense and growing. Despite the relatively young age of this population, which includes  
56 children, we report a current diabetes prevalence of 17%, of which 99% is classified as type 2  
57  
58  
59  
60

1  
2  
3 diabetes. The findings are particularly concerning when restricted to adults (29% affected). The  
4 prevalence was greatest in Central Australia, where 40% of adults now have diabetes. Age of onset  
5 was relatively young with high incidence rates observed between 30-59 years of age. Of people with  
6 diabetes who had an HbA1c level checked in 2018/19, more than one in five had an HbA1c  $\geq 10\%$   
7 ( $\geq 86$  mmol/mol). This combination of young age of onset and severe chronic hyperglycaemia is likely  
8 to be accompanied by a high burden of diabetes complications and premature mortality.<sup>18,19</sup> Of  
9 additional concern is the high proportion of people meeting criteria for diabetes who were not  
10 prescribed glucose-lowering therapy (47%) despite the mean HbA1c being 7.9% (63 mmol/mol). This  
11 suggests a significant gap between established treatment recommendations and real-world  
12 implementation into practice.  
13  
14  
15  
16  
17  
18  
19  
20  
21  
22  
23  
24  
25  
26  
27

28 The epidemic of type 2 diabetes among Aboriginal people in the remote NT has occurred in recent  
29 history and has continued to grow in the last few decades. In 1997, the prevalence of diabetes in  
30 Aboriginal adults from 15 remote communities was estimated at 15%.<sup>20</sup> Using similar data sources to  
31 our study (also including children), the prevalence of diabetes in 2005 was estimated at 16% in  
32 Central Australia and 7.7% in the Top End.<sup>11</sup> We report rates of 23% in Central Australia and 15% in  
33 the Top End. Thus, in less than 15 years, there has been substantial growth in the diabetes burden.  
34 The adult prevalence among Aboriginal people in Central Australia is among the highest ever  
35 reported, being similar to what was famously reported among the Pima Indian population of Arizona  
36 in the 1970s (42% among those aged  $\geq 25$  years) and higher than the current top country-wide  
37 prevalence, which is in the Marshall Islands (31% among those aged  $\geq 20$  years).<sup>16,21</sup> These  
38 comparisons are made for illustrative purposes only given the differences in study methodologies  
39 and lack of age standardisation to a common reference population.  
40  
41  
42  
43  
44  
45  
46  
47  
48  
49  
50  
51  
52  
53

54 There are limited published data examining temporal trends in diabetes epidemiology among  
55 Aboriginal people in Australia. An early study conducted in a single community in Central Australia,  
56 showed that the prevalence of diabetes increased from 11.6% in 1987 to 20.7% in 1995.<sup>22</sup> More  
57  
58  
59  
60

1  
2  
3 recent studies from Western Australia and the NT have examined diabetes prevalence trends during  
4 pregnancy, showing substantial growth in the number of Aboriginal women with type 2 diabetes  
5 diagnosed prior to pregnancy.<sup>23,24</sup> In addition, the incidence of diabetes among Aboriginal and Torres  
6 Strait Islander children (aged under 16 years) in Western Australia increased considerably between  
7 2000 and 2019.<sup>25</sup> Our findings add to this existing literature, showing an 18% increase in diabetes  
8 prevalence over seven years. Numerous factors, not assessed in our study, may have contributed to  
9 the observed change, such as increasing incidence, improved survival and greater uptake of  
10 screening.

11  
12  
13  
14  
15  
16  
17  
18  
19  
20  
21  
22  
23 We found that diabetes was more common with increasing age, except over 70 years, where  
24 prevalence dropped considerably. In Western populations, diabetes prevalence consistently  
25 increases with age.<sup>26</sup> However, studies in the NT Aboriginal population from the 1990s and early  
26 2000s found that diabetes prevalence peaked in middle age (45-54 years) and then decreased  
27 among older age-groups.<sup>27</sup> This was likely due to a combination of a 'healthy survivor' effect and the  
28 timing of lifestyle changes relating to colonisation. Another contributing factor could be that, despite  
29 the importance of connection to country, as a last resort, older people with chronic conditions are  
30 more likely to move to urban centres with better access to services, leaving a relatively healthier  
31 older population in remote communities. Now, two decades later, the age at which this  
32 phenomenon is observed is proportionately higher. This likely reflects improvements in life  
33 expectancy for people with chronic conditions and a greater length of time since these communities  
34 underwent rapid social and environmental transitions.

35  
36  
37  
38  
39  
40  
41  
42  
43  
44  
45  
46  
47  
48  
49  
50  
51  
52 The higher prevalence of diabetes observed among women compared to men in all age groups is  
53 noteworthy. This difference has been observed in Aboriginal Australians previously and also in other  
54 Indigenous populations in North America.<sup>8,21,28,29</sup> It contrasts with the national Australian population  
55 and most populations internationally, in which the prevalence of known diabetes is greater among  
56  
57  
58  
59  
60

1  
2  
3 men.<sup>1,16,26</sup> The disparity observed among Aboriginal women in Australia has been shown to relate to  
4  
5 obesity.<sup>8,22</sup> However, further research is needed to understand the mechanisms underlying this  
6  
7 disparity in metabolic health between Aboriginal women and men. One postulated mechanism is a  
8  
9 sex-specific difference in the impact of maternal glycaemia on the developing fetus and thus  
10  
11 diabetes risk in that next generation. The effect of fetal hyperinsulinism on both birthweight and  
12  
13 postnatal growth appears to differ between girls and boys.<sup>30,31</sup> It has been hypothesised that fetal  
14  
15 hyperinsulinism may lead to a degree of persistent insulin resistance that is more pronounced in  
16  
17 girls.<sup>31</sup> Nevertheless, it is likely that numerous biological and sociocultural factors are contributing to  
18  
19 the higher prevalence of diabetes among women than men. Differences in physical activity may be  
20  
21 partly responsible, especially among younger age groups.<sup>22</sup> Additionally, uptake of screening may  
22  
23 contribute to some of the observed difference, with national data showing that women are more  
24  
25 likely than men to undertake a routine health check specifically funded for Aboriginal and Torres  
26  
27 Strait Islander people.<sup>32</sup> Routine screening for diabetes during pregnancy and following a pregnancy  
28  
29 complicated by gestational diabetes may also have an impact.  
30  
31  
32  
33  
34  
35  
36

37 Few studies have examined diabetes incidence in Aboriginal communities in Australia. The first  
38  
39 available estimate is from two remote Central Australia communities, published in 1999. Diabetes  
40  
41 incidence among people aged  $\geq 15$  years was 20.3 per 1000 person-years.<sup>33</sup> Our current observed  
42  
43 adult incidence rate across remote NT communities was lower (12.6 per 1000 person-years). This  
44  
45 incidence rate is also lower than that observed in an Aboriginal cohort in Queensland between 1999-  
46  
47 2007.<sup>34</sup> Each of these studies involved geographically and culturally distinct populations and  
48  
49 employed different methodologies. Furthermore, the estimates are not age and sex-standardised.  
50  
51  
52  
53

54 While there may have been some improvement in diabetes incidence in the last two decades, the  
55  
56 observed rates remain high. Australian data from the National Diabetes Services Scheme (NDSS)  
57  
58 show that the national type 2 diabetes incidence rate in 2014 was 2.4 per 1000 person-years.<sup>35</sup>  
59  
60

1  
2  
3 These NDSS data may underestimate the true incidence due to unregistered cases. Nevertheless, it  
4  
5 has been estimated that 87% of people with diabetes are NDSS-registered.<sup>36</sup> Compared to these  
6  
7 data from the multiethnic national population of Australia, the age-specific incidence rate in our  
8  
9 study cohort was 26-times greater at 20-29 years, 12-times greater at 30-39 years and 5-times  
10  
11 greater at 40-49 years (DJ Magliano, personal communication). Establishing the contemporary  
12  
13 diabetes incidence rate in our study context is important for the future evaluation of public health  
14  
15 strategies aimed at preventing diabetes.  
16  
17

18  
19  
20  
21 Our study again confirms the high rates of metabolic disease that accompany rapid transitions in  
22  
23 lifestyle among previously lean and physically active populations. Such epidemiological transitions  
24  
25 have particularly impacted Indigenous peoples with similar histories of European colonisation.<sup>5,37</sup>  
26  
27 The underlying determinants are not well delineated but are likely multifactorial and compound  
28  
29 each other. A degree of heightened genetic susceptibility is hypothesised but not well proven.<sup>38</sup>  
30  
31 Growing evidence suggests epigenetic mechanisms also have a role, with factors such as intrauterine  
32  
33 exposure to hyperglycaemia or maternal undernutrition impacting long-term phenotypic expression  
34  
35 in the offspring.<sup>39</sup> Such alterations in gene expression may also be passed on to subsequent  
36  
37 generations.<sup>40</sup> The NT Aboriginal population continues to experience elevated rates of low  
38  
39 birthweight and pre-term birth.<sup>24</sup> At the same time, rates of diabetes in pregnancy and high  
40  
41 birthweight are increasing.<sup>24</sup> These early-life risk factors may be contributing to the ongoing diabetes  
42  
43 epidemic.  
44  
45  
46  
47  
48  
49

50 The higher burden of diabetes observed in Central Australia compared to the Top End is consistent  
51  
52 with previous studies.<sup>11</sup> There are numerous distinct Aboriginal people groups across the NT, with  
53  
54 great diversity in culture, environment and socioeconomic factors. An early study from the 1980s  
55  
56 found that Aboriginal people from desert communities had greater hyperinsulinemia than coastal  
57  
58  
59  
60

1  
2  
3 communities.<sup>41</sup> The authors predicted that this could indicate a future greater burden of diabetes in  
4  
5 these people groups as the duration of urbanisation increased.<sup>41</sup>  
6  
7  
8  
9

10 Underlying these biological hypotheses, the most important contributors to this epidemic are likely  
11  
12 to be social and environmental factors. Aboriginal people in the NT experience socioeconomic  
13  
14 disadvantage across numerous domains, including income, employment, education and housing.<sup>42</sup>  
15  
16 These factors explain a large portion of the inequity in health outcomes relative to non-Aboriginal  
17  
18 people.<sup>42</sup> These challenges are more pronounced in remote areas, where overcrowded, inadequate  
19  
20 housing and food insecurity are major issues.<sup>43</sup> Healthy food items are expensive in remote stores,  
21  
22 with survey data suggesting more than a third of daily energy intake is from discretionary food and  
23  
24 drinks.<sup>43</sup> Previous evidence suggests that some of the health disparities between Central Australia  
25  
26 and Top End communities relate to differences in social and environmental factors.<sup>17</sup>  
27  
28  
29  
30  
31

32 Strengths of our study include the use of detailed, individual-level data and the large sample size.  
33  
34 The use of a client population raises the question of whether the study cohort represents the true  
35  
36 population of these remote communities. As discussed in the methods, the client databases of these  
37  
38 sole-provider remote health services include almost all the local Aboriginal population. The study is  
39  
40 inherently limited by the retrospective design. Our diabetes estimates are reliant on known  
41  
42 diagnoses and it is likely the population is incompletely screened, which would contribute to an  
43  
44 underestimation of both prevalence and incidence. There may also be some bias regarding the  
45  
46 demographics of people who are more likely to participate in screening. Significant heterogeneity  
47  
48 exists between Aboriginal communities across the NT. The inclusion of data in our study from most,  
49  
50 but not all, remote communities in the region could have introduced some bias and limit the  
51  
52 generalisability. Furthermore, our findings may not be generalisable to Aboriginal peoples living in  
53  
54 urban centres due to the unique environments and population characteristics of remote Aboriginal  
55  
56 communities. Unfortunately, we were unable to assess time trends in diabetes incidence due to  
57  
58  
59  
60

1  
2  
3 limited numbers and the potential unreliability of differentiating incident and prevalent cases in the  
4  
5 early years of the PCIS electronic medical record system.  
6  
7  
8  
9  
10

## 11 **Conclusion**

12  
13  
14 The burden of type 2 diabetes among Aboriginal people in remote communities of the NT is among  
15  
16 the highest reported of any population globally despite the population being relatively young. Many  
17  
18 factors associated with increasing prevalence of diabetes are beyond individual control, and thus  
19  
20 strengthened systems of care and public health prevention strategies, developed and implemented  
21  
22 in partnership with Aboriginal communities, are needed. These strategies should be holistic,  
23  
24 considering emotional, spiritual and mental wellbeing, as well as physical health. The enormity of  
25  
26 the diabetes burden necessitates population-wide prevention strategies, including cross-sectoral  
27  
28 collaboration to address the social determinants of health.  
29  
30  
31  
32  
33  
34  
35  
36  
37  
38  
39  
40  
41  
42  
43  
44  
45  
46  
47  
48  
49  
50  
51  
52  
53  
54  
55  
56  
57  
58  
59  
60



1  
2  
3 **Contributors:** MJLH led the analysis planning, interpretation of findings and drafting of the  
4 manuscript. HF and LJMB contributed equally as senior authors, supervising all aspects of the study,  
5 including conception of the study, ethics application, study design, study conduct, analysis planning,  
6 interpretation of findings and manuscript preparation. YZ, SG, PB and ELMB contributed to study  
7 conception, study design, analysis planning, interpretation of findings and critically revised the  
8 manuscript. YZ additionally provided statistical expertise and undertook the data analysis. DB (a  
9 Jawoyn woman and health policymaker), AR (a Gubbi Gubbi woman and Senior Remote Medical  
10 Practitioner in Central Australia) and EE (Endocrinologist in Central Australia) contributed to  
11 interpretation of data and critically revised the work for important intellectual content. All authors  
12 approved the final version and agreed to be accountable for the work. YZ is the guarantor for the  
13 analyses.  
14  
15  
16  
17  
18  
19  
20  
21  
22

23 **Acknowledgments:** We gratefully acknowledge the contribution of an Aboriginal community  
24 member from the Central Australia region of the NT, who revised the manuscript and requested to  
25 remain anonymous. We acknowledge NT Health for access to the datasets used and thank  
26 professionals from NT Health hospitals and remote primary healthcare who contributed to these  
27 datasets in their day-to-day work.  
28  
29  
30  
31  
32

33 **Funding:** This research did not receive any specific grant from funding agencies in the public,  
34 commercial or not-for-profit sectors. MJLH is supported by National Health and Medical Research  
35 Council (NHMRC) postgraduate scholarship (No. 1169091), Diabetes Australia and the Australian  
36 Academy of Science. LJMB is supported by NHMRC Investigator Grant (No. 1194698).  
37  
38  
39  
40  
41

42 **Data availability statement:** The Northern Territory Department of Health is the owner of the data  
43 used for this study. Reasonable requests for access to the deidentified study dataset would be  
44 considered after required approvals from the data custodians are in place.  
45  
46  
47

48 **Competing interests:** MJLH has received honoraria for lectures and consultancies from AstraZeneca,  
49 Eli Lilly and Novo Nordisk. All other authors have no interests to declare.  
50  
51  
52  
53  
54  
55  
56  
57  
58  
59  
60

**References:**

1. NCD Risk Factor Collaboration. Worldwide trends in diabetes since 1980: a pooled analysis of 751 population-based studies with 4.4 million participants. *Lancet* 2016;**387**:1513-30.
2. Zimmet PZ, Magliano DJ, Herman WH, *et al.* Diabetes: a 21st century challenge. *Lancet Diabetes Endocrinol* 2014;**2**:56-64.
3. Harding JL, Pavkov ME, Magliano DJ, *et al.* Global trends in diabetes complications: a review of current evidence. *Diabetologia* 2019;**62**:3-16.
4. Hare MJL, Topliss DJ. Classification and Laboratory Diagnosis of Diabetes Mellitus. In: Bandeira F, Gharib H, Griz L, Faria M, eds. *Endocrinology and Diabetes*. Springer, Cham: 2022:303-13.
5. Harris SB, Tompkins JW, TeHiwi B. Call to action: A new path for improving diabetes care for Indigenous peoples, a global review. *Diabetes Res Clin Pract* 2017;**123**:120-33.
6. Australian Bureau of Statistics. Causes of Death, Australia. Canberra: ABS, 2020. Accessed via: <https://www.abs.gov.au/statistics/health/causes-death/causes-death-australia/2019> [Accessed 30 December 2020].
7. Australian Bureau of Statistics. *National Aboriginal and Torres Strait Islander Health Survey, 2018-19. Ref: 4715.0*. Canberra: ABS, 2019. Accessed via: <https://www.abs.gov.au/statistics/people/aboriginal-and-torres-strait-islander-peoples/national-aboriginal-and-torres-strait-islander-health-survey/2018-19> [Accessed 19 May 2020].
8. Minges KE, Zimmet P, Magliano DJ, *et al.* Diabetes prevalence and determinants in Indigenous Australian populations: A systematic review. *Diabetes Res Clin Pract* 2011;**93**:139-49.
9. Northern Territory Government Department of Treasury and Finance. Northern Territory Economy - Population. Darwin: Northern Territory Government, 2020. Accessed via: <https://nteconomy.nt.gov.au/population> [Accessed 28 October 2020].
10. Northern Territory Government. Aboriginal languages in NT, 2018. Accessed via: <https://nt.gov.au/community/interpreting-and-translating-services/aboriginal-interpretation-service/aboriginal-languages-in-nt> [Accessed 18 August 2021].
11. Zhao Y, Connors C, Wright J, *et al.* Estimating chronic disease prevalence among the remote Aboriginal population of the Northern Territory using multiple data sources. *Aust N Z J Public Health* 2008;**32**:307-13.
12. Australian Bureau of Statistics. 1270.0.55.005 Australian Statistical Geography Standard (ASGS): Volume 5 - Remoteness Structure, July 2016. Canberra: Commonwealth of Australia; 2018.
13. Foley M, Zhao Y, Condon J. *Demographic data quality assessment for Northern Territory public hospitals 2011*. Darwin: Northern Territory Government Department of Health; 2012.
14. Li L, Guthridge S, Li SQ, *et al.* Estimating the total prevalence and incidence of end-stage kidney disease among Aboriginal and non-Aboriginal populations in the Northern Territory of Australia, using multiple data sources. *BMC Nephrol* 2018;**19**:15.

- 1
- 2
- 3
- 4 15. The Royal Australian College of General Practitioners. Management of type 2 diabetes: A
- 5 handbook for general practice. East Melbourne, Vic: RACGP; 2020.
- 6
- 7 16. Saeedi P, Petersohn I, Salpea P, *et al.* Global and regional diabetes prevalence estimates for
- 8 2019 and projections for 2030 and 2045: Results from the International Diabetes Federation
- 9 Diabetes Atlas, 9(th) edition. *Diabetes Res Clin Pract* 2019;**157**:107843.
- 10
- 11 17. Munoz E, Powers JR, Nienhuys TG, *et al.* Social and environmental factors in 10 aboriginal
- 12 communities in the Northern Territory: relationship to hospital admissions of children. *Med J*
- 13 *Aust* 1992;**156**:529-33.
- 14
- 15 18. Magliano DJ, Sacre JW, Harding JL, *et al.* Young-onset type 2 diabetes mellitus - implications for
- 16 morbidity and mortality. *Nat Rev Endocrinol* 2020;**16**:321-31.
- 17
- 18 19. Stratton IM, Adler AI, Neil HA, *et al.* Association of glycaemia with macrovascular and
- 19 microvascular complications of type 2 diabetes (UKPDS 35): prospective observational study.
- 20 *BMJ* 2000;**321**:405-12.
- 21
- 22 20. Daniel M, Rowley KG, McDermott R, *et al.* Diabetes and impaired glucose tolerance in
- 23 Aboriginal Australians: prevalence and risk. *Diabetes Res Clin Pract* 2002;**57**:23-33.
- 24
- 25 21. Bennett PH, Burch TA, Miller M. Diabetes mellitus in American (Pima) Indians. *Lancet*
- 26 1971;**2**:125-8.
- 27
- 28 22. McDermott R, Rowley KG, Lee AJ, *et al.* Increase in prevalence of obesity and diabetes and
- 29 decrease in plasma cholesterol in a central Australian Aboriginal community. *Med J Aust*
- 30 2000;**172**:480-4.
- 31
- 32 23. Ahmed MA, Bailey HD, Pereira G, *et al.* Trends and burden of diabetes in pregnancy among
- 33 Aboriginal and non-Aboriginal mothers in Western Australia, 1998-2015. *BMC Public Health*
- 34 2022;**22**:263.
- 35
- 36 24. Hare MJL, Barzi F, Boyle JA, *et al.* Diabetes during pregnancy and birthweight trends among
- 37 Aboriginal and non-Aboriginal people in the Northern Territory of Australia over 30 years.
- 38 *Lancet Reg Health West Pac* 2020;**1**:100005.
- 39
- 40 25. Haynes A, Curran JA, Davis EA. Two decades of increasing incidence of childhood-onset type 2
- 41 diabetes in Western Australia (2000-2019). *Med J Aus* 2021;**214**:285-6.
- 42
- 43 26. Dunstan DW, Zimmet PZ, Welborn TA, *et al.* The rising prevalence of diabetes and impaired
- 44 glucose tolerance: the Australian Diabetes, Obesity and Lifestyle Study. *Diabetes Care*
- 45 2002;**25**:829-34.
- 46
- 47 27. Brimblecombe J, Mackerras D, Garnggulkpuy J, *et al.* Leanness and type 2 diabetes in a
- 48 population of indigenous Australians. *Diabetes Res Clin Pract* 2006;**72**:93-9.
- 49
- 50 28. Dyck R, Osgood N, Lin TH, *et al.* Epidemiology of diabetes mellitus among First Nations and non-
- 51 First Nations adults. *CMAJ* 2010;**182**:249-56.
- 52
- 53 29. Scavini M, Stidley CA, Shah VO, *et al.* Prevalence of diabetes is higher among female than male
- 54 Zuni Indians. *Diabetes Care* 2003;**26**:55-60.
- 55
- 56
- 57
- 58
- 59
- 60

- 1
  - 2
  - 3
  - 4
  - 5
  - 6
  - 7
  - 8
  - 9
  - 10
  - 11
  - 12
  - 13
  - 14
  - 15
  - 16
  - 17
  - 18
  - 19
  - 20
  - 21
  - 22
  - 23
  - 24
  - 25
  - 26
  - 27
  - 28
  - 29
  - 30
  - 31
  - 32
  - 33
  - 34
  - 35
  - 36
  - 37
  - 38
  - 39
  - 40
  - 41
  - 42
  - 43
  - 44
  - 45
  - 46
  - 47
  - 48
  - 49
  - 50
  - 51
  - 52
  - 53
  - 54
  - 55
  - 56
  - 57
  - 58
  - 59
  - 60
30. Shields BM, Knight B, Hopper H, *et al.* Measurement of cord insulin and insulin-related peptides suggests that girls are more insulin resistant than boys at birth. *Diabetes Care* 2007;**30**:261-6.
31. Regnault N, Botton J, Heude B, *et al.* Higher cord C-peptide concentrations are associated with slower growth rate in the 1st year of life in girls but not in boys. *Diabetes* 2011;**60**:2152-9.
32. Australian Institute of Health and Welfare. Indigenous health checks and follow-ups. Cat. no. IHW 209. Canberra: AIHW, 2021. Accessed via <https://www.aihw.gov.au/reports/indigenous-australians/indigenous-health-checks-follow-ups/> [Accessed 27 September 2021].
33. Daniel M, Rowley KG, McDermott R, *et al.* Diabetes incidence in an Australian aboriginal population. An 8-year follow-up study. *Diabetes Care* 1999;**22**:1993-8.
34. McDermott RA, Li M, Campbell SK. Incidence of type 2 diabetes in two Indigenous Australian populations: a 6-year follow-up study. *Med J Aust* 2010;**192**:562-5.
35. Magliano DJ, Chen L, Islam RM, *et al.* Multi-country analysis of trends in the incidence of diagnosed diabetes from 22 million diagnoses in higher-income settings. *Lancet Diabetes Endocrinol* 2021;**9**:203-11.
36. Davis WA, Peters KE, Makepeace A, *et al.* Prevalence of diabetes in Australia: insights from the Fremantle Diabetes Study Phase II. *Intern Med J* 2018;**48**:803-9.
37. Maple-Brown LJ, Hampton D. Indigenous cultures in countries with similar colonisation histories share the challenge of intergenerational diabetes. *Lancet Glob Health* 2020;**8**:e619-20.
38. Pearson ER. Dissecting the Etiology of Type 2 Diabetes in the Pima Indian Population. *Diabetes* 2015;**64**:3993-5.
39. Hjort L, Novakovic B, Grunnet LG, *et al.* Diabetes in pregnancy and epigenetic mechanisms - how the first 9 months from conception may affect the child's epigenome and later risk of disease. *Lancet Diabetes Endocrinol* 2019;**7**:796-806.
40. Gluckman PD, Hanson MA, Cooper C, *et al.* Effect of in utero and early-life conditions on adult health and disease. *N Engl J Med* 2008;**359**:61-73.
41. O'Dea K, Traianedes K, Hopper JL, *et al.* Impaired glucose tolerance, hyperinsulinemia, and hypertriglyceridemia in Australian aborigines from the desert. *Diabetes Care* 1988;**11**:23-9.
42. Zhao Y, You J, Wright J, *et al.* Health inequity in the Northern Territory, Australia. *Int J Equity Health* 2013;**12**:79.
43. Australian Indigenous HealthInfoNet. *Summary of nutrition among Aboriginal and Torres Strait Islander people*. Accessed via <https://healthinonet.ecu.edu.au/nutrition2020> [Accessed 2 November 2020].

**Table 1. Characteristics of Aboriginal people with prevalent diabetes in 2018/19 in the NT, with comparison by region**

|                                     | <b>Total NT<br/>(n=3477)</b> | <b>Central<br/>Australia<br/>(n=1382)</b> | <b>Top End<br/>(n=2095)</b> | <b>P<br/>value<br/>(CA vs<br/>TE)</b> |
|-------------------------------------|------------------------------|-------------------------------------------|-----------------------------|---------------------------------------|
| <b>Age, years</b>                   | 49 (39-58)                   | 48 (37-58)                                | 49 (40-58)                  | 0.003                                 |
| <b>Female</b>                       | 2115 (61)                    | 834 (60)                                  | 1281 (61)                   | 0.637                                 |
| <b>Diabetes type</b>                |                              |                                           |                             | 0.269                                 |
| Type 2                              | 3429 (98.6)                  | 1368 (98.9)                               | 2061 (98.4)                 |                                       |
| Type 1                              | 34 (1.0)                     | 9 (0.7)                                   | 25 (1.2)                    |                                       |
| Other                               | 14 (0.4)                     | 5 (0.5)                                   | 9 (0.4)                     |                                       |
| <b>Treatment</b>                    |                              |                                           |                             |                                       |
| No GLT                              | 1627 (47)                    | 542 (39)                                  | 1085 (52)                   | <0.001                                |
| Non-insulin GLT                     | 1181 (34)                    | 508 (37)                                  | 673 (32)                    | 0.005                                 |
| Combined GLT (with insulin)         | 610 (18)                     | 307 (22)                                  | 303 (15)                    | <0.001                                |
| Insulin alone                       | 59 (1.7)                     | 25 (1.8)                                  | 34 (1.6)                    | 0.678                                 |
| <b>Mean HbA1c*</b>                  |                              |                                           |                             |                                       |
| (NGSP %)                            | 7.9 ( $\pm$ 0.04)            | 8.4 ( $\pm$ 0.07)                         | 7.7 ( $\pm$ 0.05)           | <0.001                                |
| (mmol/mol)                          | 63 ( $\pm$ 0.4)              | 68 ( $\pm$ 0.8)                           | 61 ( $\pm$ 0.5)             |                                       |
| <b>Median HbA1c*</b>                |                              |                                           |                             | <0.001                                |
| (NGSP %)                            | 7.2 (6.1-9.4)                | 7.8 (6.3-10.1)                            | 7.0 (6.0-8.9)               |                                       |
| (mmol/mol)                          | 55 (43-79)                   | 62 (45-87)                                | 53 (42-74)                  |                                       |
| <b>HbA1c category*</b>              |                              |                                           |                             | <0.001                                |
| <7.0%<br>(<53 mmol/mol)             | 1216 (35)                    | 375 (27)                                  | 641 (40)                    |                                       |
| 7.0-7.9%<br>(53-63 mmol/mol)        | 415 (12)                     | 159 (12)                                  | 256 (12)                    |                                       |
| 8.0-9.9%<br>(64-85 mmol/mol)        | 540 (16)                     | 228 (17)                                  | 312 (15)                    |                                       |
| $\geq$ 10%<br>( $\geq$ 86 mmol/mol) | 567 (16)                     | 281 (20)                                  | 286 (14)                    |                                       |
| No result                           | 739 (21)                     | 339 (25)                                  | 400 (19)                    |                                       |

Data are n (%), median (IQR) or mean ( $\pm$ SE). CA = Central Australia, TE = Top End, GLT = glucose lowering therapy, HbA1c = haemoglobin A1c. \*The single most recent HbA1c result for each individual within the 2018/19 year was included. Individuals with no HbA1c in that 12 month period were excluded from calculation of means/medians and reported in the "no result" category.

## Figure Legends

1  
2  
3  
4  
5  
6  
7  
8  
9

**Figure 1. Map of the Top End (TE) and Central Australia (CA) regions of the Northern Territory, Australia, showing the 51 remote clinics (triangles) and 6 hospitals (crosses) contributing data to this study**

10  
11  
12  
13

There are two hospitals in the location at the top left (North West) of the Top End. Distances and locations are approximate.

14  
15  
16

**Figure 2. Trend in crude diabetes prevalence among Aboriginal people (all ages) in remote NT communities over seven years**

17  
18  
19  
20

Error bars are 95% confidence intervals. Note the vast majority of prevalent diagnoses were classified as type 2 diabetes (98.6% type 2, 0.17% type 1 and 0.07% other diabetes in 2018/19).

21  
22  
23  
24

**Figure 3. Age and sex-specific diabetes prevalence in 2018/19 among Aboriginal people in remote NT communities**

25  
26

Error bars are 95% confidence intervals.

27  
28  
29  
30  
31  
32  
33  
34  
35  
36  
37  
38  
39  
40  
41  
42  
43  
44  
45  
46  
47  
48  
49  
50  
51  
52  
53  
54  
55  
56  
57  
58  
59  
60

**Figure 4. Age-specific diabetes incidence rates between 2016/17 and 2018/19 among Aboriginal people in remote NT communities**

Error bars are 95% confidence intervals. Out of 483 incident diabetes diagnoses, 481 (99.6%) were recorded as type 2 diabetes.

1  
2  
3  
4  
5  
6  
7  
8  
9  
10  
11  
12  
13  
14  
15  
16  
17  
18  
19  
20  
21  
22  
23  
24  
25  
26  
27  
28  
29  
30  
31  
32  
33  
34  
35  
36  
37  
38  
39  
40  
41  
42  
43  
44  
45  
46  
47  
48  
49  
50  
51  
52  
53  
54  
55  
56  
57  
58  
59  
60

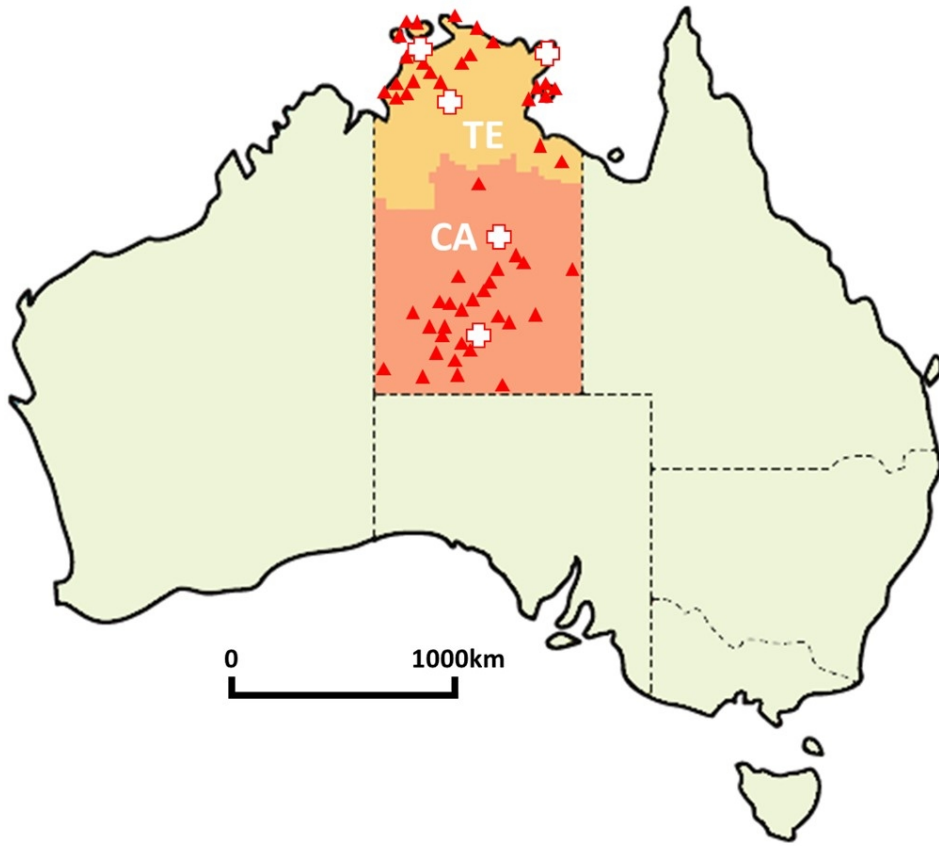

90x90mm (300 x 300 DPI)

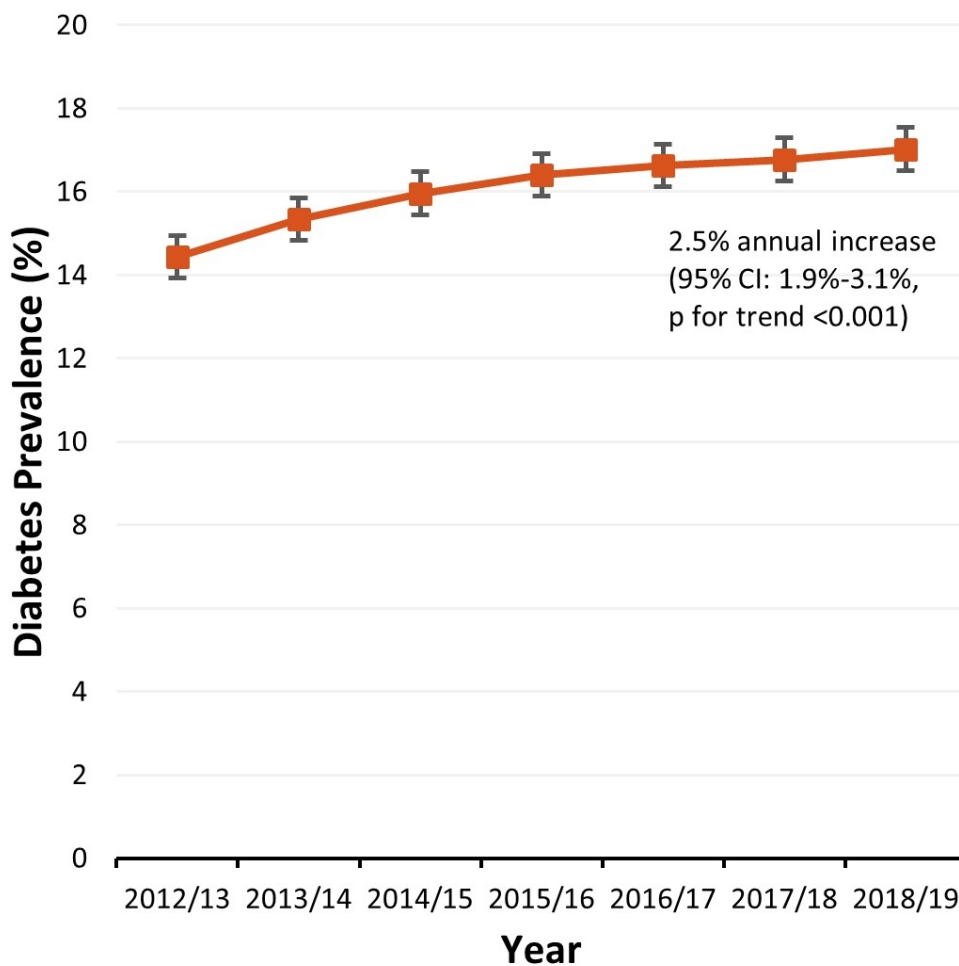

90x90mm (300 x 300 DPI)



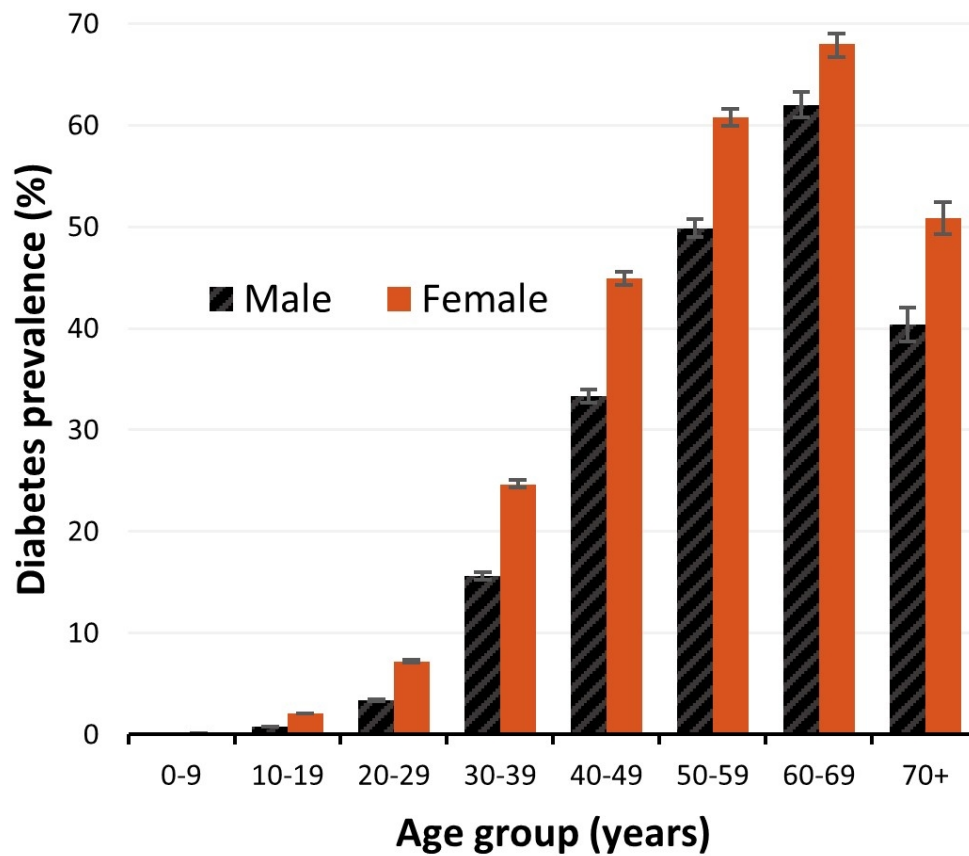

*Diabetes prevalence (%)*

|        |      |      |      |      |      |      |      |      |
|--------|------|------|------|------|------|------|------|------|
| Male   | 0.05 | 0.79 | 3.37 | 15.6 | 33.4 | 49.9 | 62.0 | 40.4 |
| Female | 0.10 | 2.05 | 7.20 | 24.7 | 44.9 | 60.8 | 68.0 | 50.9 |

90x90mm (300 x 300 DPI)

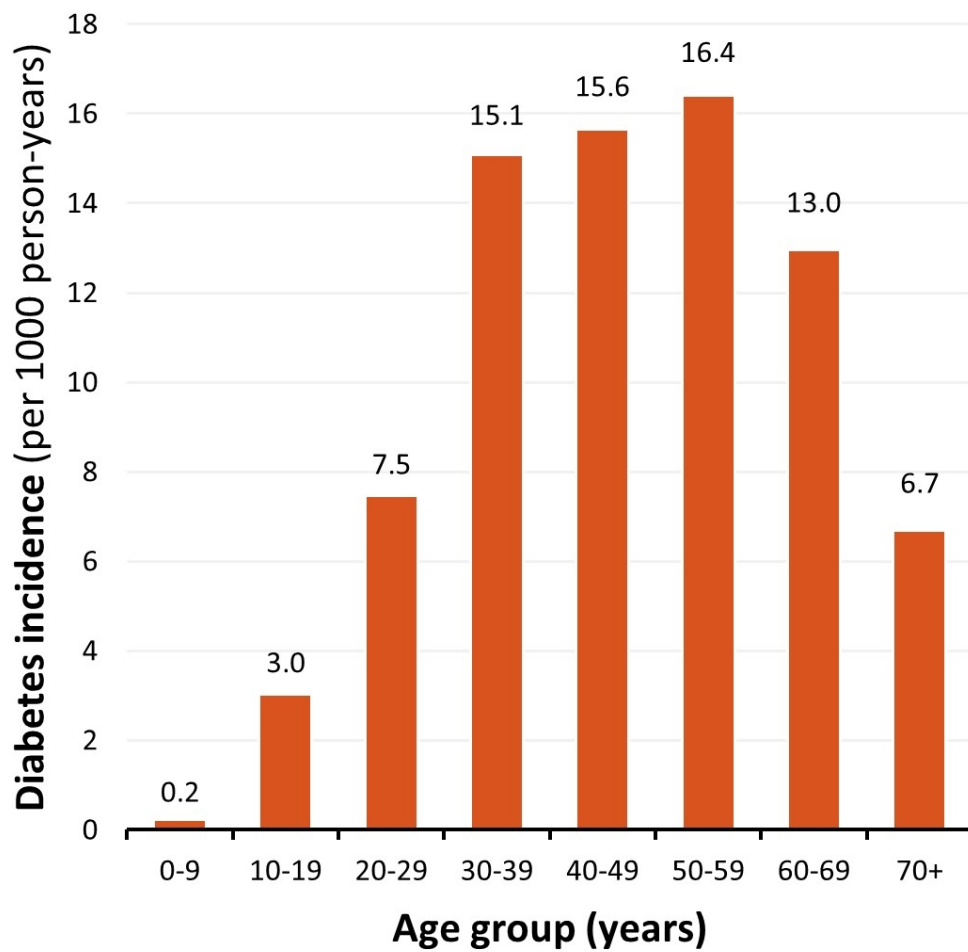

90x90mm (300 x 300 DPI)

## APPENDIX

Supplementary Table 1. ICPC and ICD-10-AM diagnostic codes used in diabetes case definitions

|                      | ICPC         | ICD-10-AM                                  |
|----------------------|--------------|--------------------------------------------|
| Any diabetes         | T89*<br>T90* | E10*-E14*<br>O24.0-O24.3<br>O24.5<br>O24.9 |
| Type 1 diabetes      | T89002       | E10*<br>O24.0                              |
| Other diabetes       | T90017       | E13*                                       |
| Gestational diabetes | W85*         | O24.4                                      |

\* indicates truncation. ICPC: International Classification of Primary Care; ICD-10-AM: International Classification of Diseases, Tenth Revision, Australian Modification.

## Validation study results

Manual review of individual electronic health records was undertaken to inform our study definition of diabetes. Three specific potential issues were targeted including: (i) whether or not prescription of metformin indicates a diagnosis of diabetes, (ii) whether cases of gestational diabetes mellitus (GDM) were adequately excluded, and (iii) the accuracy of determination of diabetes type, especially in young-onset diabetes. This work was undertaken by a single research assistant with a clinical background under the supervision of an endocrinologist, who personally reviewed all records where there was any doubt about the patient's diabetes diagnosis.

Metformin prescription was removed from the study definition of diabetes following manual review of a sample (n=62) of people prescribed metformin but with no other glucose-lowering medication, no coding for a diabetes diagnosis and no biochemical data to support a diabetes diagnosis. Of these people, 52 (81%) did not have diabetes. The most common indication for metformin in this subgroup was diabetes prevention in high-risk individuals (including pre-diabetes, evidence of insulin resistance and antipsychotic use), followed by GDM and polycystic ovarian syndrome.

To avoid including diagnoses of GDM, we excluded all medication and biochemistry data in the nine months preceding and three months following the allocation of a GDM diagnostic code in either the primary care or hospital datasets. In order to assess this approach, we investigated the health records of a random sample of women (n=40) of childbearing age (born between 1<sup>st</sup> July 1968 and 1<sup>st</sup> July 1998) who had been defined as having diabetes. Once metformin had been removed from the study definition of diabetes, 39 (98%) of these women were confirmed as having established diabetes. Therefore, we deemed that the approach to excluding GDM was adequate.

With regard to determining diabetes type, we were concerned about two non-specific ICPC codes (T89001 – "Insulin dependent" and T89003 – "Juvenile onset") intended to report type 1 diabetes in the ICPC classification system. Insulin is frequently used for type 2 diabetes and there is a high burden of youth-onset type 2 diabetes among Aboriginal people in the Northern Territory. In a random sample (n=28), only 4 (14%) of people coded as T89001 had type 1 diabetes, therefore we did not include this code in our type 1 diabetes definition. Only two people were assigned the

1  
2  
3 T89003 code. One of these had type 2 diabetes, the other had pre-diabetes. This code was also  
4 removed from the type 1 diabetes definition.  
5

6  
7 To further assess the accuracy of identification of diabetes type in young people, we took a random  
8 sample (n=40) of people with diabetes born on or after 1<sup>st</sup> July 1988. Only one of these people had  
9 type 1 diabetes and it had been coded appropriately in the study dataset.  
10  
11  
12  
13  
14  
15  
16  
17  
18  
19  
20  
21  
22  
23  
24  
25  
26  
27  
28  
29  
30  
31  
32  
33  
34  
35  
36  
37  
38  
39  
40  
41  
42  
43  
44  
45  
46  
47  
48  
49  
50  
51  
52  
53  
54  
55  
56  
57  
58  
59  
60

For peer review only

## STROBE Statement—checklist of items that should be included in reports of observational studies

|                              | Item No | Recommendation                                                                                                                                                                                                                                                                                                                                                                                                                                                         | Page No          |
|------------------------------|---------|------------------------------------------------------------------------------------------------------------------------------------------------------------------------------------------------------------------------------------------------------------------------------------------------------------------------------------------------------------------------------------------------------------------------------------------------------------------------|------------------|
| <b>Title and abstract</b>    | 1       | (a) Indicate the study's design with a commonly used term in the title or the abstract                                                                                                                                                                                                                                                                                                                                                                                 | 1,2              |
|                              |         | (b) Provide in the abstract an informative and balanced summary of what was done and what was found                                                                                                                                                                                                                                                                                                                                                                    | 2                |
| <b>Introduction</b>          |         |                                                                                                                                                                                                                                                                                                                                                                                                                                                                        |                  |
| Background/rationale         | 2       | Explain the scientific background and rationale for the investigation being reported                                                                                                                                                                                                                                                                                                                                                                                   | 4                |
| Objectives                   | 3       | State specific objectives, including any prespecified hypotheses                                                                                                                                                                                                                                                                                                                                                                                                       | 5                |
| <b>Methods</b>               |         |                                                                                                                                                                                                                                                                                                                                                                                                                                                                        |                  |
| Study design                 | 4       | Present key elements of study design early in the paper                                                                                                                                                                                                                                                                                                                                                                                                                | 5                |
| Setting                      | 5       | Describe the setting, locations, and relevant dates, including periods of recruitment, exposure, follow-up, and data collection                                                                                                                                                                                                                                                                                                                                        | 5-6              |
| Participants                 | 6       | (a) <i>Cohort study</i> —Give the eligibility criteria, and the sources and methods of selection of participants. Describe methods of follow-up<br><i>Case-control study</i> —Give the eligibility criteria, and the sources and methods of case ascertainment and control selection. Give the rationale for the choice of cases and controls<br><i>Cross-sectional study</i> —Give the eligibility criteria, and the sources and methods of selection of participants | 5-6              |
|                              |         | (b) <i>Cohort study</i> —For matched studies, give matching criteria and number of exposed and unexposed<br><i>Case-control study</i> —For matched studies, give matching criteria and the number of controls per case                                                                                                                                                                                                                                                 | NA               |
| Variables                    | 7       | Clearly define all outcomes, exposures, predictors, potential confounders, and effect modifiers. Give diagnostic criteria, if applicable                                                                                                                                                                                                                                                                                                                               | 6                |
| Data sources/<br>measurement | 8*      | For each variable of interest, give sources of data and details of methods of assessment (measurement). Describe comparability of assessment methods if there is more than one group                                                                                                                                                                                                                                                                                   | 6<br>(+appendix) |
| Bias                         | 9       | Describe any efforts to address potential sources of bias                                                                                                                                                                                                                                                                                                                                                                                                              | 5,13             |
| Study size                   | 10      | Explain how the study size was arrived at                                                                                                                                                                                                                                                                                                                                                                                                                              | 5                |
| Quantitative variables       | 11      | Explain how quantitative variables were handled in the analyses. If applicable, describe which groupings were chosen and why                                                                                                                                                                                                                                                                                                                                           | 7                |
| Statistical methods          | 12      | (a) Describe all statistical methods, including those used to control for confounding                                                                                                                                                                                                                                                                                                                                                                                  | 7                |
|                              |         | (b) Describe any methods used to examine subgroups and interactions                                                                                                                                                                                                                                                                                                                                                                                                    | 7                |
|                              |         | (c) Explain how missing data were addressed                                                                                                                                                                                                                                                                                                                                                                                                                            | 19               |
|                              |         | (d) <i>Cohort study</i> —If applicable, explain how loss to follow-up was addressed<br><i>Case-control study</i> —If applicable, explain how matching of cases and controls was addressed<br><i>Cross-sectional study</i> —If applicable, describe analytical methods taking account of sampling strategy                                                                                                                                                              | NA               |
|                              |         | (e) Describe any sensitivity analyses                                                                                                                                                                                                                                                                                                                                                                                                                                  | NA               |

Continued on next page

**Results**

|                  |     |                                                                                                                                                                                                              |     |
|------------------|-----|--------------------------------------------------------------------------------------------------------------------------------------------------------------------------------------------------------------|-----|
| Participants     | 13* | (a) Report numbers of individuals at each stage of study—eg numbers potentially eligible, examined for eligibility, confirmed eligible, included in the study, completing follow-up, and analysed            | 8   |
|                  |     | (b) Give reasons for non-participation at each stage                                                                                                                                                         | NA  |
|                  |     | (c) Consider use of a flow diagram                                                                                                                                                                           | NA  |
| Descriptive data | 14* | (a) Give characteristics of study participants (eg demographic, clinical, social) and information on exposures and potential confounders                                                                     | 8   |
|                  |     | (b) Indicate number of participants with missing data for each variable of interest                                                                                                                          | 19  |
|                  |     | (c) <i>Cohort study</i> —Summarise follow-up time (eg, average and total amount)                                                                                                                             | NA  |
| Outcome data     | 15* | <i>Cohort study</i> —Report numbers of outcome events or summary measures over time                                                                                                                          | 8,9 |
|                  |     | <i>Case-control study</i> —Report numbers in each exposure category, or summary measures of exposure                                                                                                         |     |
|                  |     | <i>Cross-sectional study</i> —Report numbers of outcome events or summary measures                                                                                                                           |     |
| Main results     | 16  | (a) Give unadjusted estimates and, if applicable, confounder-adjusted estimates and their precision (eg, 95% confidence interval). Make clear which confounders were adjusted for and why they were included | 8,9 |
|                  |     | (b) Report category boundaries when continuous variables were categorized                                                                                                                                    | 19  |
|                  |     | (c) If relevant, consider translating estimates of relative risk into absolute risk for a meaningful time period                                                                                             | NA  |
| Other analyses   | 17  | Report other analyses done—eg analyses of subgroups and interactions, and sensitivity analyses                                                                                                               | 8   |

**Discussion**

|                  |    |                                                                                                                                                                            |    |
|------------------|----|----------------------------------------------------------------------------------------------------------------------------------------------------------------------------|----|
| Key results      | 18 | Summarise key results with reference to study objectives                                                                                                                   | 9  |
| Limitations      | 19 | Discuss limitations of the study, taking into account sources of potential bias or imprecision. Discuss both direction and magnitude of any potential bias                 | 13 |
| Interpretation   | 20 | Give a cautious overall interpretation of results considering objectives, limitations, multiplicity of analyses, results from similar studies, and other relevant evidence | 14 |
| Generalisability | 21 | Discuss the generalisability (external validity) of the study results                                                                                                      | 13 |

**Other information**

|         |    |                                                                                                                                                               |    |
|---------|----|---------------------------------------------------------------------------------------------------------------------------------------------------------------|----|
| Funding | 22 | Give the source of funding and the role of the funders for the present study and, if applicable, for the original study on which the present article is based | 15 |
|---------|----|---------------------------------------------------------------------------------------------------------------------------------------------------------------|----|

\*Give information separately for cases and controls in case-control studies and, if applicable, for exposed and unexposed groups in cohort and cross-sectional studies.

**Note:** An Explanation and Elaboration article discusses each checklist item and gives methodological background and published examples of transparent reporting. The STROBE checklist is best used in conjunction with this article (freely available on the Web sites of PLoS Medicine at <http://www.plosmedicine.org/>, Annals of Internal Medicine at <http://www.annals.org/>, and Epidemiology at <http://www.epidem.com/>). Information on the STROBE Initiative is available at [www.strobe-statement.org](http://www.strobe-statement.org).
